# Supplementary material
Source: PubMed Central journal article supplement (PMC4195762)
Supplement: embj0033-1802-sd1.pdf [file embj0033-1802-sd1.pdf]

## SUPPLEMENTARY MATERIAL

Elharar *et al*, 2014

### SUPPLEMENTARY FIGURE LEGENDS

**Figure S1. Pupylome quantification and purification.** (A) Aliquots of *M. smegmatis* cultures were collected at the indicated time points, as described in the main text, and prepared together with a purified pupylome for quantification, as described in the Experimental Procedures section. A lysate purified from a  $\Delta pafA$  mutant (designated "B") served as a blank for quantification. Dot blot analysis was carried out with anti-Pup antibodies according to standard protocols. (B) Pupylomes were purified from exponentially growing and stationary phase *M. smegmatis* cultures expressing dually polyhistidine- and streptactin-tagged Pup via tandem affinity purification. Shown are fractions of the final purification step, as analyzed by Western analysis using anti-Pup antibodies. (C) The same procedure as in (B) was carried out for control cultures not expressing the dually-tagged Pup.

**Figure S2. Gel loading controls.** Shown are the PVDF membranes used in Western blots that are presented throughout this paper. At the end of each Western analysis, the membranes were stained by Coomassie Brilliant Blue, de-stained and air-dried. For each membrane presented, the figure number and antibodies used are indicated. Asterisks indicate that the membranes were stripped before a second use with an additional antibody, as indicated. For the membranes presented in Fig. 6C, additional information is provided (P-Z = Pup-Zur; Z=Zur).

**Figure S3. The anti-Pup antibodies detect two cross-reacting proteins.** (A) The *paf* operon was deleted from the Msm chromosome via homologous recombination using a suicide plasmid carrying

a hygromycin-resistance cassette. (B) Southern analysis of BsrDI-digested DNA from the wild type and  $\Delta pafA$  strains. Probes specific for the hygromycin-resistance gene (left) and for a DNA sequence upstream of the deleted region were used. (C, D) Western analysis using anti-PafA and anti-Pup antibodies, as indicated. (E, F) Following expression of a polyhistidine-streptactin-tagged Pup in the  $\Delta pafA$  mutant, tandem purification was carried out as described (Festa et al., 2010 and Methods). Samples from the purification steps were subjected to Western analysis using anti-Pup antibodies. The final sample was concentrated prior to analysis. Only the dually-tagged Pup was eluted following the final purification step. By contrast, although the two bands in question could be seen in the lysate prior to purification, they were not bound by the affinity columns and as such correspond to antibody-cross-reacting proteins.

**Figure S4. *M. smegmatis* growth is limited by the availability of a carbon source under standard growth conditions.** A carbon or a nitrogen source, or both, were added to stationary phase *M. smegmatis* cultures previously inoculated in 7H9 supplemented with 0.4% glycerol (v/v). Turbidity was measured before and 24 h after nutrient addition. Whereas carbon source addition allowed growth to resume, nitrogen source addition did not, indicating the carbon source was the limiting factor. The final cell density was, however, higher when both carbon and nitrogen sources were added, indicating that when a carbon source alone was added, a nitrogen source became limiting.

**Figure S5. Proteasomal degradation of PPS components.** (A) Exponentially growing cultures (O.D.<sub>600</sub>=0.5) of a  $\Delta prcSBA$  mutant that expresses either *prcS* or the *prcSBA* operon from an integrated plasmid were starved for nitrogen. Aliquots were collected at the indicated time points from the onset of starvation (t=0) for Western analysis. (B) As in A, except that the cultures were starved for 7 days before the first aliquot (t=0) was collected.

## SUPPLEMENTARY TABLE LEGENDS

Table S1 – Exponential phase pupylome, Table S2 – Stationary phase pupylome.

Column annotation: MSMEG – *M. smegmatis* identifier, MH+[Da] – Observed mass of precursor peptide,  $\Delta M[\text{ppm}]$  – deviation of observed peptide mass from calculated mass in parts per million, m – oxidation of methionine, c – Carbamidomethylation of cysteine, k – identified pupylation site.

Colors annotation: Pale blue – depicts *M. smegmatis* proteins that were found to be pupylated in previous studies (Poulsen C, *et al.*, 2010, Watrous J, *et al.*, 2010). Yellow – Identified pupylated peptides.

Fig. S1

A

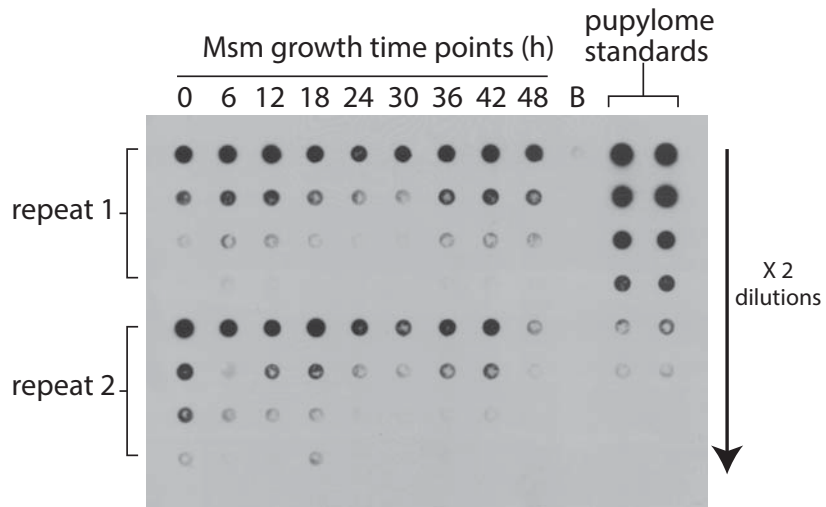

B

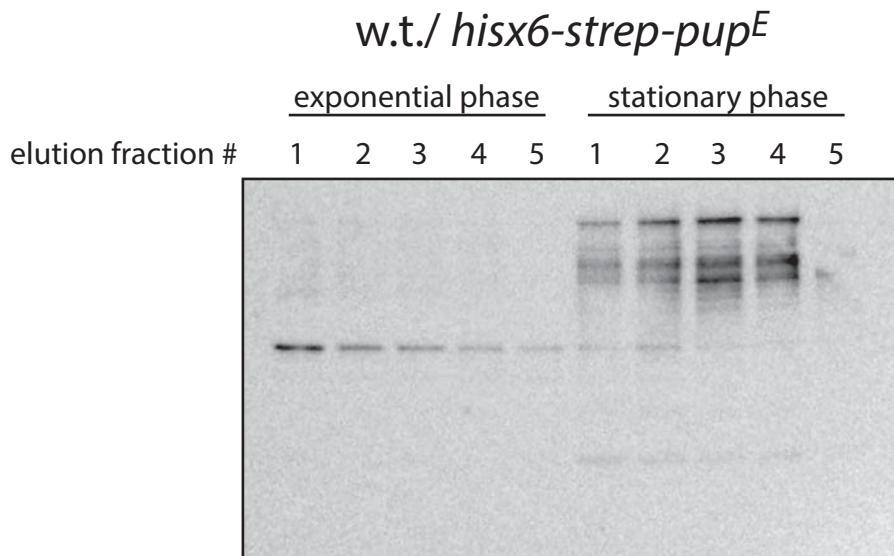

C

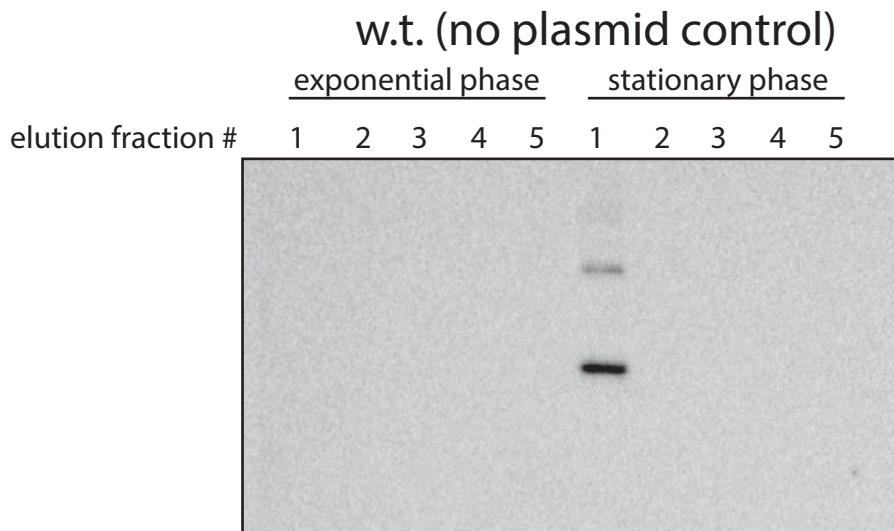

# Fig. S2

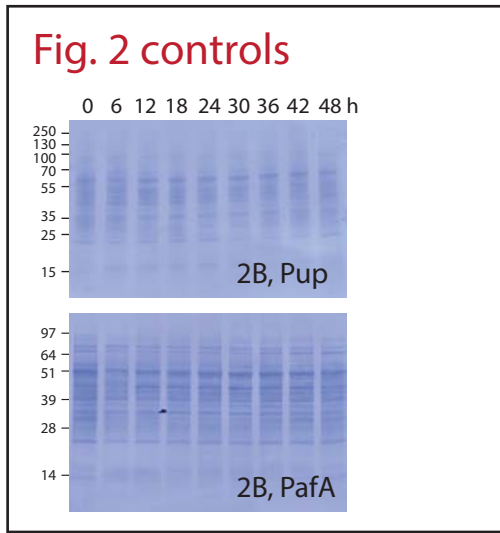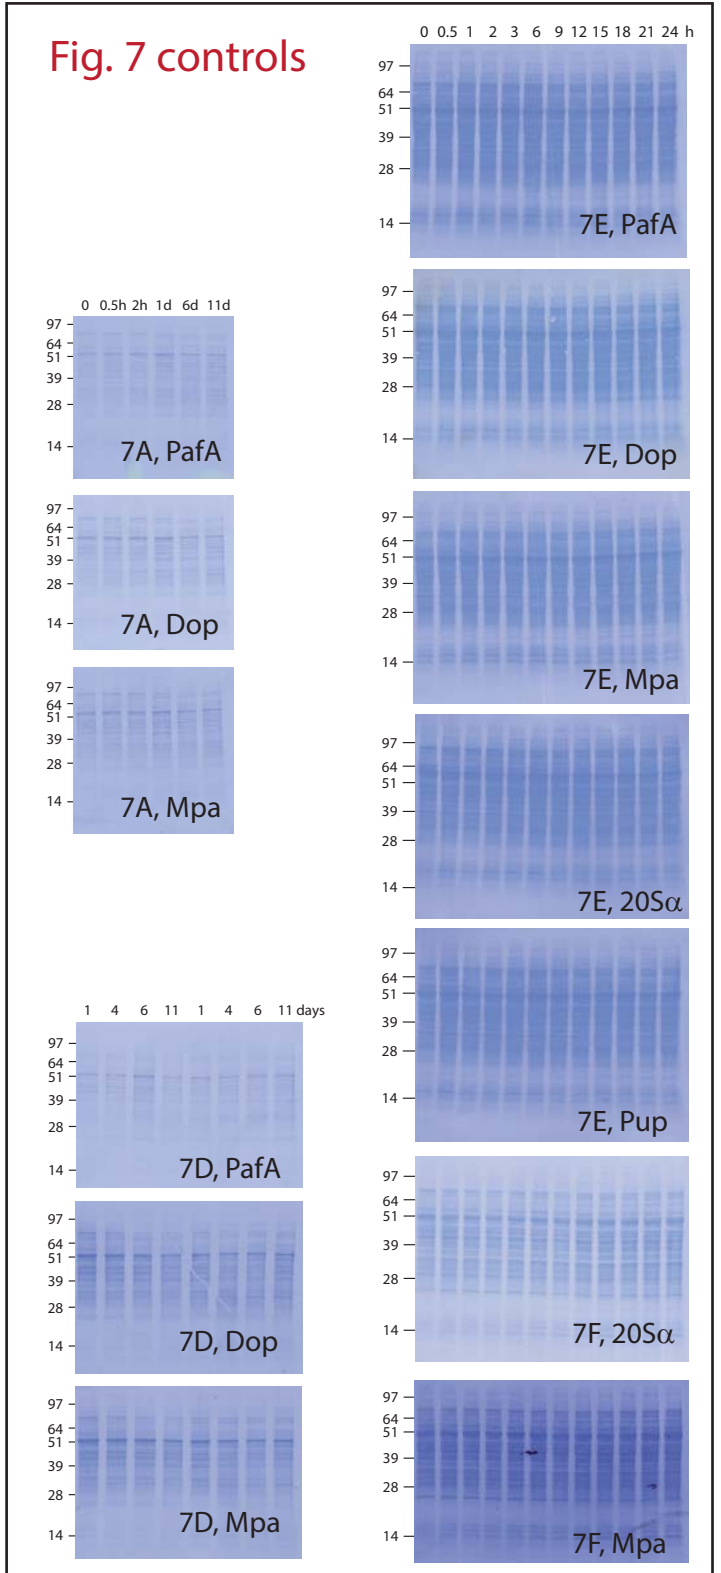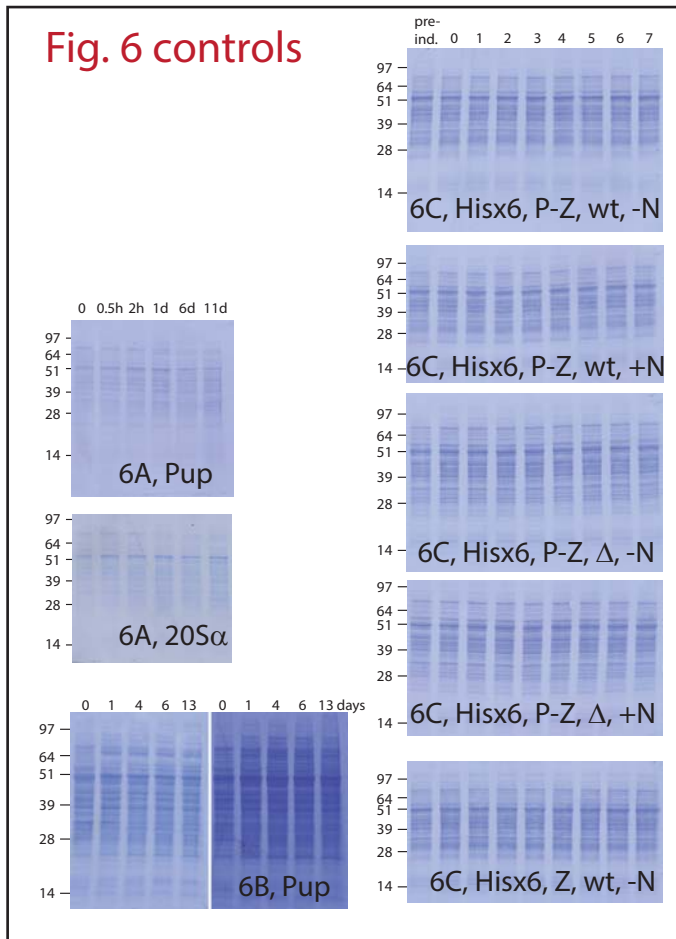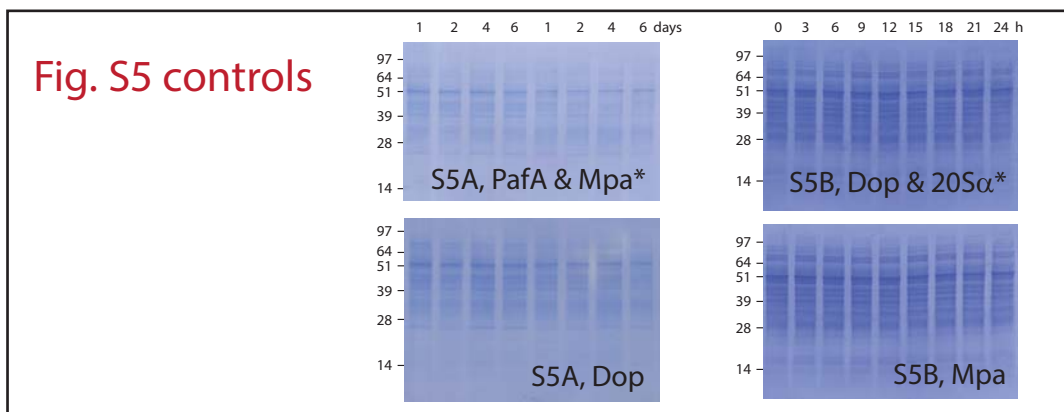

Fig. S3

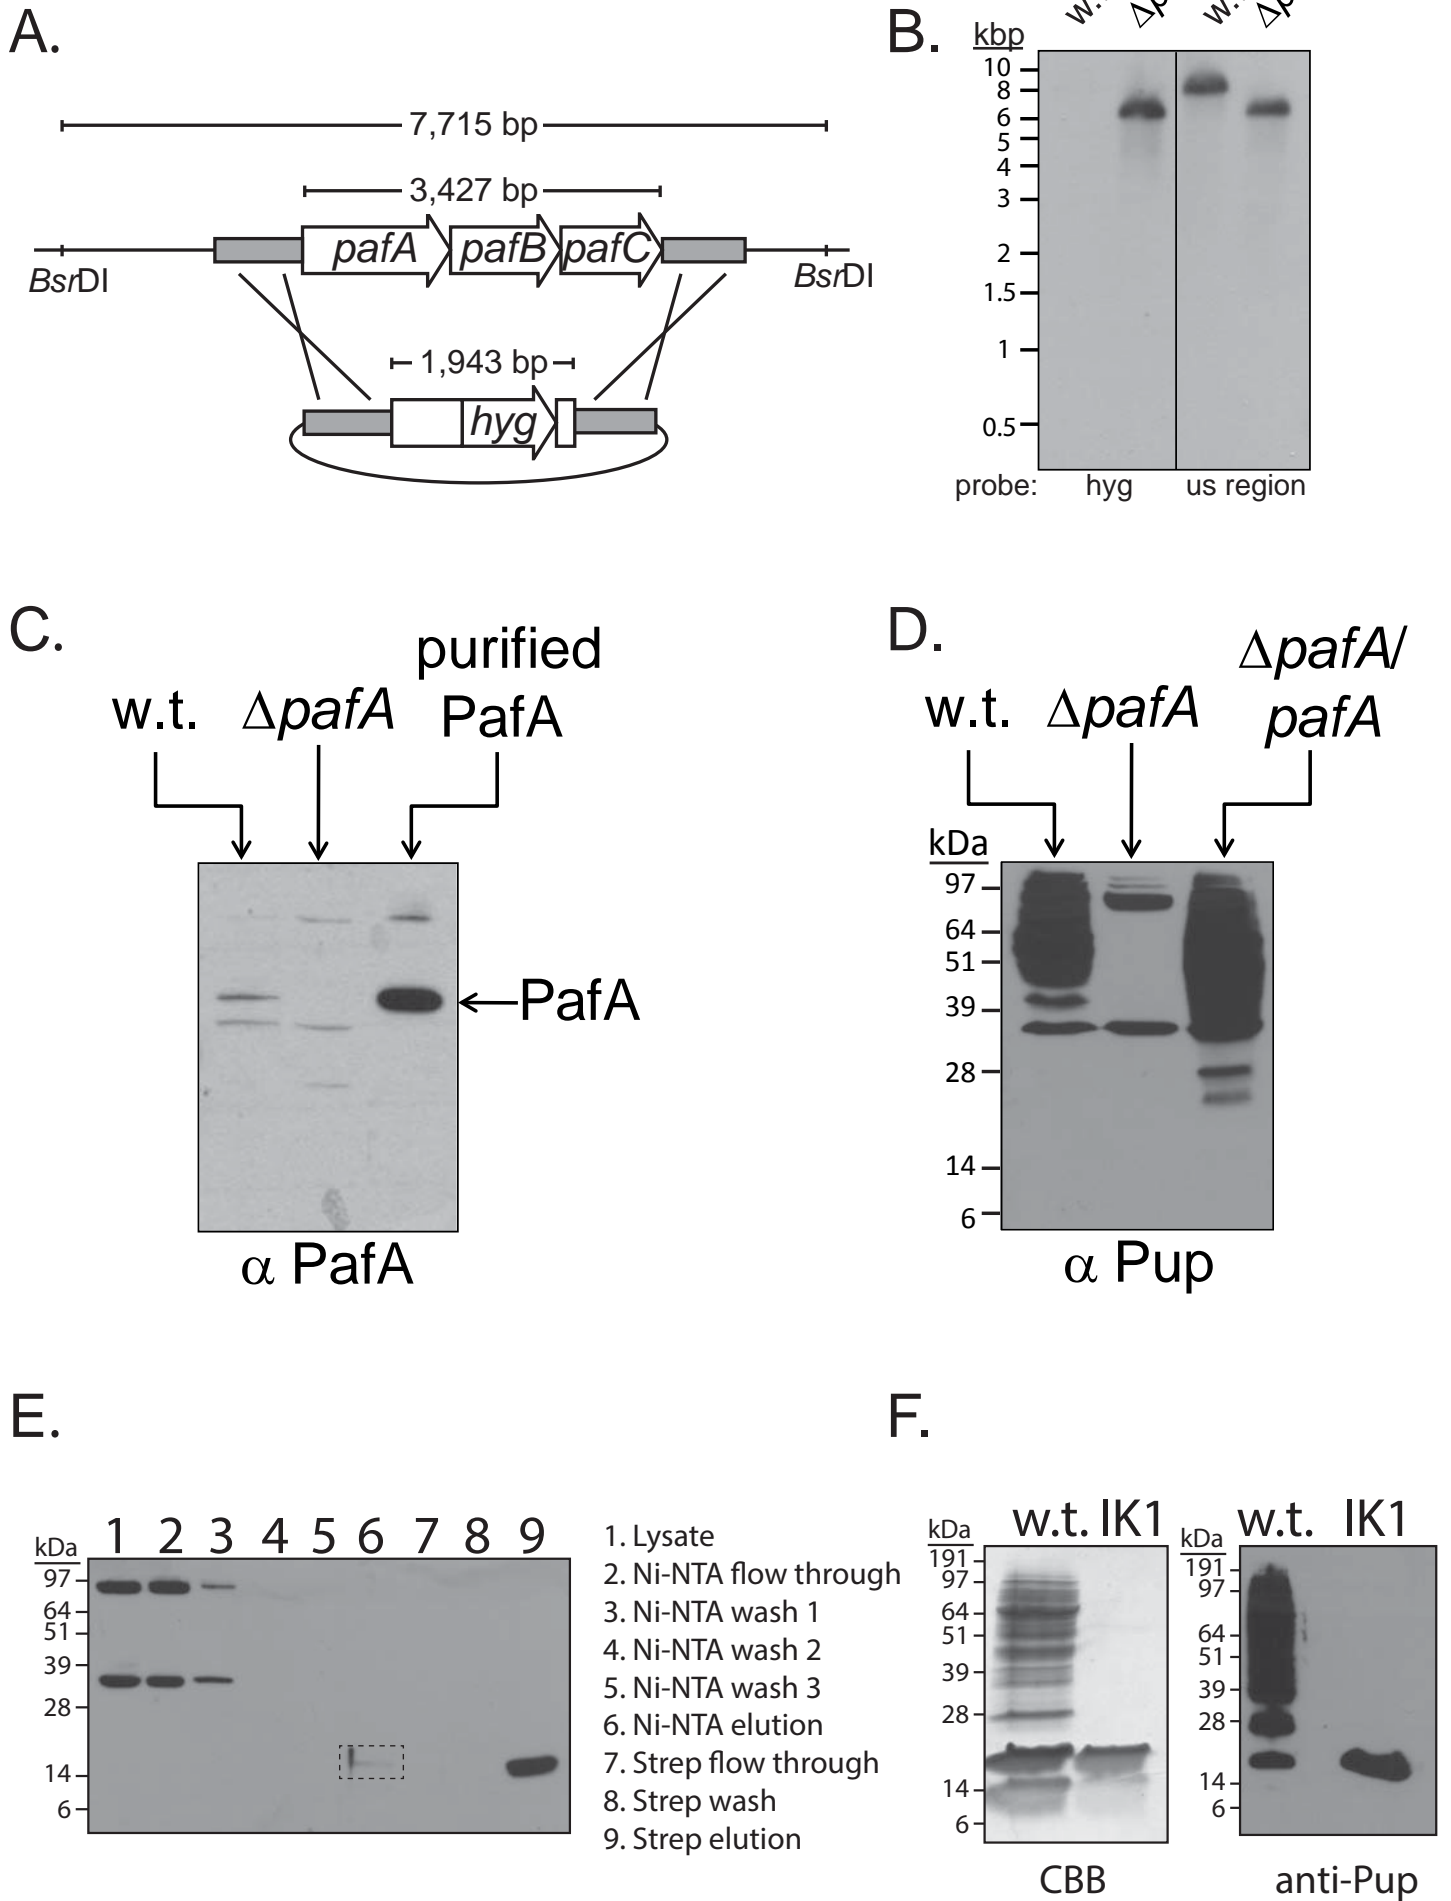

Fig. S4

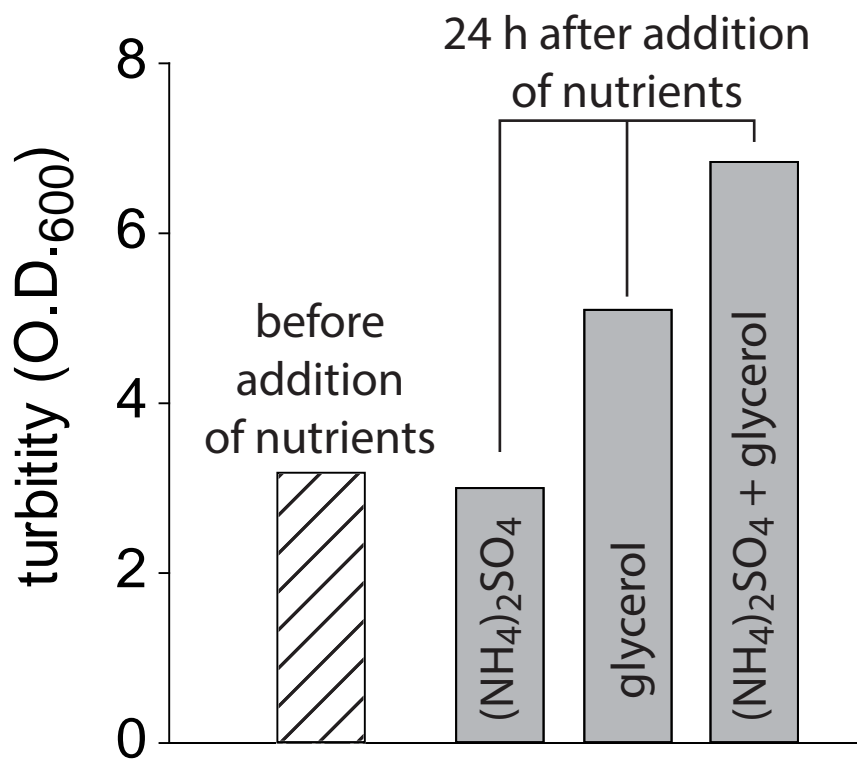





Table S1 – Exponential phase pupylome

| Accession            | MSMEG | Description                                                                                           | Score  | %Coverage | Sequence                                                                                                                                                                                                                                 | MH+ [Da]                                                                                                                                                           | $\Delta M$ [ppm]                                                                                         | XCorr                                                                                         |
|----------------------|-------|-------------------------------------------------------------------------------------------------------|--------|-----------|------------------------------------------------------------------------------------------------------------------------------------------------------------------------------------------------------------------------------------------|--------------------------------------------------------------------------------------------------------------------------------------------------------------------|----------------------------------------------------------------------------------------------------------|-----------------------------------------------------------------------------------------------|
| 259546730            | 3896  | RecName: Full=Prokaryotic ubiquitin-like protein Pup; AltName: Full=Bacterial ubiquitin-like modifier | 440.35 | 76.56     | EKLTEETDILLDEIDVLEENAEDEVFR<br>GGGGGEDDDLPGASAAGQER<br>LTEETDILLDEIDVLEENAEDEVFR<br>RGGGGGEDDDLPGASAAGQER<br>RGGGGGEDDDLPGASAAGQER<br>GGGGGEDDDLPGASAAGQER                                                                               | 3194.48069<br>1815.77495<br>2937.34403<br>2127.97904<br>1971.87700<br>1971.87503                                                                                   | 1.83<br>0.46<br>2.30<br>1.26<br>0.90<br>-0.10                                                            | 6.18<br>5.18<br>4.95<br>4.01<br>3.69<br>3.33                                                  |
| 118469767(118472545) | 6427  | [Mn] superoxide dismutase [Mycobacterium smegmatis str. MC2 155]                                      | 125.41 | 35.75     | Sequence<br>NLSPNGGDKPTGELAAAIDDQFGSFDK<br>AFWVWVWVDDVQNR<br>HHATTYKGVNDATAK<br>ANGDHAALFLEK<br>GVNDATAKLEEAR                                                                                                                            | MH+ [Da]<br>2764.30790<br>1762.83196<br>1866.94975<br>1399.69805<br>1385.73796                                                                                     | $\Delta M$ [ppm]<br>0.62<br>1.30<br>2.15<br>1.09<br>-0.32                                                | XCorr<br>5.68<br>4.79<br>4.14<br>3.88<br>3.83                                                 |
| 118470577            | 4323  | pyruvate dehydrogenase subunit E1 [Mycobacterium smegmatis str. MC2 155]                              | 84.16  | 24.54     | Sequence<br>GLIQVAANEALDNLTFVINCLQR<br>LMPDFWEEPTVSMGLPMMIATVQAR<br>VPVSDAQLEEDPYLPPYYHHPGPEAIR<br>KGGGQAVATTMATVR<br>SAQIIASGVAMPEALR<br>KGGGQAVATTMATVR<br>SKPLALPGSDTYK<br>IIQELSFRR<br>TGDGLWAAADQMAR<br>GYTLGQHFEGR<br>TFGMDSWPFSLK | MH+ [Da]<br>2686.40403<br>2871.37534<br>3178.54245<br>1564.81144<br>1613.86980<br>1580.80753<br>1376.74346<br>1281.68547<br>1462.67632<br>1264.60906<br>1415.66741 | $\Delta M$ [ppm]<br>2.16<br>2.96<br>1.75<br>0.12<br>1.08<br>0.86<br>1.01<br>1.29<br>1.29<br>1.66<br>0.66 | XCorr<br>7.42<br>4.99<br>3.97<br>3.95<br>3.39<br>3.35<br>3.09<br>3.09<br>3.05<br>2.91<br>2.68 |

|           |      |                                                                                     |       |       |                                           |            |                     |       |
|-----------|------|-------------------------------------------------------------------------------------|-------|-------|-------------------------------------------|------------|---------------------|-------|
| 118470644 | 6904 | myo-inositol-1-phosphate synthase<br>[Mycobacterium smegmatis str. MC2<br>155]      | 83.61 | 41.87 | AVPEQIRPWVPGTYTLGTDGFGFSDTRPAAR           | 3461.76963 | 2.71                | 2.95  |
|           |      |                                                                                     |       |       | RYFNTDAESWVAVLQGLAR                       | 2208.17759 | 0.16                | 2.23  |
|           |      |                                                                                     |       |       | LALEDLK                                   | 801.47423  | 3.17                | 1.49  |
|           |      |                                                                                     |       |       | Sequence                                  | MH+ [Da]   | $\Delta$ M<br>[ppm] | XCorr |
|           |      |                                                                                     |       |       | TYQLNVGNNMDFLMLER                         | 2115.00200 | 1.01                | 5.22  |
|           |      |                                                                                     |       |       | VGFDLSEALFASENNTIK                        | 1954.97539 | -0.18               | 5.06  |
|           |      |                                                                                     |       |       | KFEDAGVPIVGGDIK                           | 1602.83818 | 0.45                | 4.82  |
|           |      |                                                                                     |       |       | GIGGPIEAASAYLMK                           | 1477.77446 | 1.66                | 4.45  |
|           |      |                                                                                     |       |       | YYADTIEVSDAEPV/DVK                        | 2012.97222 | 1.11                | 4.45  |
|           |      |                                                                                     |       |       | TQAVTSNLSGALAGKVEDK                       | 1889.00640 | 4.69                | 4.42  |
|           |      |                                                                                     |       |       | VAVVGNACASSLVQGVQYYR                      | 2240.15141 | 0.95                | 4.33  |
|           |      |                                                                                     |       |       | NADENTTVPGLMHVK                           | 1625.80217 | 4.25                | 3.69  |
|           |      |                                                                                     |       |       | IADVPTDVIYQR                              | 1422.80058 | 3.80                | 2.98  |
|           |      |                                                                                     |       |       | NADENTTVPGLMHVK                           | 1641.79026 | 0.05                | 1.93  |
|           |      |                                                                                     |       |       | Sequence                                  | MH+ [Da]   | $\Delta$ M<br>[ppm] | XCorr |
| 118474021 | 4294 | glutamine synthetase [Mycobacterium<br>smegmatis str. MC2 155]                      | 76.71 | 37.67 | SPDSAcNPYLTFAVLLAAGLR                     | 2236.14629 | 1.40                | 5.42  |
|           |      |                                                                                     |       |       | LVHGGEAPTAASWGAA NR                       | 1764.87847 | 0.43                | 4.90  |
|           |      |                                                                                     |       |       | SVAIAPAELEGAFEEGIGFDGSSIEGFAR             | 2926.40384 | -2.34               | 4.73  |
|           |      |                                                                                     |       |       | GYVLGPQAEDNWWSLTQEER                      | 2291.09526 | 0.57                | 3.88  |
|           |      |                                                                                     |       |       | LWFTDVLGYLK                               | 1354.74077 | 0.12                | 3.82  |
|           |      |                                                                                     |       |       | VFESDTPARPPDPTFQVLPWK                     | 2419.23374 | 1.81                | 3.58  |
|           |      |                                                                                     |       |       | SFIAGILEHANEISAVTNQWNSYK                  | 2791.41245 | 2.64                | 3.38  |
|           |      |                                                                                     |       |       | YADALSMADNVMVTFR                          | 1704.77580 | 2.18                | 3.23  |
|           |      |                                                                                     |       |       | SFIAGILEHANEISAVTNQWNSYKR                 | 2947.51040 | 1.43                | 2.09  |
|           |      |                                                                                     |       |       | SEWENYR                                   | 983.42162  | -0.15               | 1.35  |
|           |      |                                                                                     |       |       | Sequence                                  | MH+ [Da]   | $\Delta$ M<br>[ppm] | XCorr |
| 300680919 | 3897 | RecName: Full=Pup<br>deamidase/deputyase; AltName:<br>Full=Deamidase of protein Pup | 73.18 | 38.96 | LHVITGDANLLETSTYLYK                       | 1958.06035 | 0.49                | 5.10  |
|           |      |                                                                                     |       |       | IIGTEVEYGISSPDPPTANPILTSTQAVLAVYAAAAAGIQR | 3946.04336 | -0.31               | 4.88  |
|           |      |                                                                                     |       |       | AHVGALLDSVDSAVELVEQLTN                    | 2280.17681 | 2.16                | 4.81  |

|                      |            |                                                                           |       |       |                               |            |                  |       |
|----------------------|------------|---------------------------------------------------------------------------|-------|-------|-------------------------------|------------|------------------|-------|
| 118472545(118469767) | 6636       | [Mn] superoxide dismutase<br>[Mycobacterium smegmatis str. MC2 155]       | 69.68 | 49.51 | VGIQPSGDEPFGQLSQR             | 1743.86687 | 0.42             | 4.09  |
|                      |            |                                                                           |       |       | LVTEQVLDAVENPPTDTR            | 2125.07988 | 1.24             | 3.76  |
|                      |            |                                                                           |       |       | TRWDYEVESPLR                  | 1550.76128 | 0.93             | 3.68  |
|                      |            |                                                                           |       |       | LHLVDLQYSDVR                  | 1457.77483 | 0.05             | 3.51  |
|                      |            |                                                                           |       |       | QTPFSAVIAGLTPFMVSR            | 1922.02117 | 0.33             | 3.34  |
|                      |            |                                                                           |       |       | GASYGSHENYIMSR                | 1571.69267 | 1.22             | 2.95  |
|                      |            |                                                                           |       |       | LHLVDLQYSDVRLDK               | 1813.98062 | -0.06            | 2.54  |
|                      |            |                                                                           |       |       | ELTALALQQR                    | 1014.59789 | 3.56             | 2.45  |
|                      |            |                                                                           |       |       | IPTLEPLRGSK                   | 1210.71819 | 2.25             | 2.46  |
|                      |            |                                                                           |       |       | IPTLEPLR                      | 938.56682  | -0.18            | 1.73  |
| 118470483            | 6772       | hypothetical protein MSMEG_6772<br>[Mycobacterium smegmatis str. MC2 155] | 66.77 | 45.91 | Sequence                      | MH+ [Da]   | $\Delta$ M [ppm] | XCorr |
|                      |            |                                                                           |       |       | TYGELNADKSNAIYPTWYSGR         | 2505.20586 | 0.52             | 4.54  |
|                      |            |                                                                           |       |       | MDEFPQDYELFDLGDVTLQHGATLR     | 2910.36699 | 1.86             | 4.52  |
|                      |            |                                                                           |       |       | MIVAPAEKDLFPPDEEFAYK          | 2538.24980 | 0.95             | 4.35  |
|                      |            |                                                                           |       |       | SALTADAARFKEGWYTEKPTK         | 2214.10782 | 0.00             | 4.07  |
|                      |            |                                                                           |       |       | YFIIVPMWILGNGLSTSPSNTPPPYNAAR | 2991.50859 | 1.73             | 3.25  |
|                      |            |                                                                           |       |       | TSEHNIVFLEGVK                 | 1472.77629 | 1.26             | 3.01  |
|                      |            |                                                                           |       |       | VIPGTYGHFAGGDANPEDNKFIDGLVR   | 2871.44913 | 2.29             | 2.93  |
|                      |            |                                                                           |       |       | Sequence                      | MH+ [Da]   | $\Delta$ M [ppm] | XCorr |
|                      |            |                                                                           |       |       | CFEAGALASGAELIVTPESKRYAEFR    | 2813.38272 | 0.40             | 4.90  |
| RVASTLAEGGFVDTER     | 1707.87210 | 3.50                                                                      | 4.36  |       |                               |            |                  |       |
| GGFDGQHFHAMVHPVDVAR  | 2165.03691 | 1.05                                                                      | 4.13  |       |                               |            |                  |       |
| 118469679            | 1679       | AmbB [Mycobacterium smegmatis str. MC2 155]                               | 63.54 | 30.13 | Sequence                      | MH+ [Da]   | $\Delta$ M [ppm] | XCorr |
|                      |            |                                                                           |       |       | CFEAGALASGAELIVTPESKRYAEFR    | 2813.38272 | 0.40             | 4.90  |
|                      |            |                                                                           |       |       | RVASTLAEGGFVDTER              | 1707.87210 | 3.50             | 4.36  |
|                      |            |                                                                           |       |       | GGFDGQHFHAMVHPVDVAR           | 2165.03691 | 1.05             | 4.13  |
|                      |            |                                                                           |       |       | Sequence                      | MH+ [Da]   | $\Delta$ M [ppm] | XCorr |
|                      |            |                                                                           |       |       | CFEAGALASGAELIVTPESKRYAEFR    | 2813.38272 | 0.40             | 4.90  |
|                      |            |                                                                           |       |       | RVASTLAEGGFVDTER              | 1707.87210 | 3.50             | 4.36  |
|                      |            |                                                                           |       |       | GGFDGQHFHAMVHPVDVAR           | 2165.03691 | 1.05             | 4.13  |
|                      |            |                                                                           |       |       | Sequence                      | MH+ [Da]   | $\Delta$ M [ppm] | XCorr |
|                      |            |                                                                           |       |       | CFEAGALASGAELIVTPESKRYAEFR    | 2813.38272 | 0.40             | 4.90  |
| RVASTLAEGGFVDTER     | 1707.87210 | 3.50                                                                      | 4.36  |       |                               |            |                  |       |
| GGFDGQHFHAMVHPVDVAR  | 2165.03691 | 1.05                                                                      | 4.13  |       |                               |            |                  |       |

|                        |            |                                                                 |       |       |                            |            |                  |       |
|------------------------|------------|-----------------------------------------------------------------|-------|-------|----------------------------|------------|------------------|-------|
| 118470561              | 4303       | methyltransferase [Mycobacterium smegmatis str. MC2 155]        | 58.88 | 35.14 | DLYDHPETAWEEVR             | 1771.82866 | 0.00             | 4.06  |
|                        |            |                                                                 |       |       | VASTLAEGGFVTER             | 1551.77239 | 4.75             | 3.26  |
|                        |            |                                                                 |       |       | AQPFVAVSHSHIEYR            | 1641.81841 | 3.13             | 3.13  |
|                        |            |                                                                 |       |       | AETLGQLAEIERK              | 1457.80144 | 3.79             | 3.00  |
|                        |            |                                                                 |       |       | AETLGQLAEIER               | 1329.70000 | -0.71            | 2.84  |
|                        |            |                                                                 |       |       | QFVSGPDTAMAR               | 1279.61125 | 0.96             | 2.54  |
|                        |            |                                                                 |       |       | Sequence                   | MH+ [Da]   | $\Delta$ M [ppm] | XCorr |
|                        |            |                                                                 |       |       | APADLYAAGHAELAAYPSVQVR     | 2270.15923 | 1.20             | 6.36  |
|                        |            |                                                                 |       |       | VASDLPAGHALDLGGEGGDVWVLAER | 2736.30631 | 0.56             | 5.70  |
|                        |            |                                                                 |       |       | HDLSEFPDGEFDLVSAQFLHSTVR   | 2833.34690 | 1.42             | 5.21  |
| 118469746              | 6756       | glycerol kinase [Mycobacterium smegmatis str. MC2 155]          | 57.45 | 16.24 | VLLVDAGEQSNLPAHGIIGLLGSDGR | 2545.34307 | 2.37             | 4.81  |
|                        |            |                                                                 |       |       | LVAHDGELVAVVEFTDGR         | 1928.97295 | 0.84             | 4.67  |
|                        |            |                                                                 |       |       | SPLAQLGATGAPTRLAGDAVVDTFGR | 2664.44097 | 1.98             | 4.36  |
|                        |            |                                                                 |       |       | VTAVDISHTALSR              | 1369.74480 | 0.98             | 3.54  |
|                        |            |                                                                 |       |       | SVHHPFGHGWEVR              | 1817.79966 | -0.17            | 3.09  |
|                        |            |                                                                 |       |       | DAPLAVLAR                  | 925.54875  | 2.33             | 1.82  |
|                        |            |                                                                 |       |       | Sequence                   | MH+ [Da]   | $\Delta$ M [ppm] | XCorr |
|                        |            |                                                                 |       |       | TAGLLPATAAELDDEILLAR       | 2065.15605 | 0.96             | 6.33  |
|                        |            |                                                                 |       |       | YIAALDQGTSTR               | 1396.70879 | 1.47             | 3.97  |
|                        |            |                                                                 |       |       | IIPQALADADVEPR             | 1507.81218 | 0.40             | 3.06  |
| GLVVGILTSVYTK          | 1236.72112 | 1.02                                                            | 2.91  |       |                            |            |                  |       |
| QIMALGITNQR            | 1244.68230 | 3.43                                                            | 2.57  |       |                            |            |                  |       |
| RIIPQALADADVEPR        | 1663.92558 | 7.75                                                            | 2.51  |       |                            |            |                  |       |
| AVLEATVWQIR            | 1257.69536 | 0.24                                                            | 2.21  |       |                            |            |                  |       |
| Sequence               | MH+ [Da]   | $\Delta$ M [ppm]                                                | XCorr |       |                            |            |                  |       |
| ATVGEVNAEQSNINWGWK     | 1873.91094 | 3.72                                                            | 4.72  |       |                            |            |                  |       |
| TANIALHYLDGEKR         | 1713.92949 | 0.69                                                            | 3.83  |       |                            |            |                  |       |
| RGASVSDFAEITR          | 1408.72246 | 3.17                                                            | 3.60  |       |                            |            |                  |       |
| QGDVIESGANADIKRGNMLPLR | 2278.18814 | 4.14                                                            | 3.59  |       |                            |            |                  |       |
| NIPAGTVIHAVELRPGGAK    | 1957.10759 | 4.96                                                            | 3.38  |       |                            |            |                  |       |
| 118472263              | 1439       | 50S ribosomal protein L2 [Mycobacterium smegmatis str. MC2 155] | 47.60 | 34.89 | Sequence                   | MH+ [Da]   | $\Delta$ M [ppm] | XCorr |
|                        |            |                                                                 |       |       | Sequence                   | MH+ [Da]   | $\Delta$ M [ppm] | XCorr |

|           |      |                                                                                    |       |       |                                      |            |                  |       |
|-----------|------|------------------------------------------------------------------------------------|-------|-------|--------------------------------------|------------|------------------|-------|
| 118470741 | 3300 | oxidoreductase, Gfo/Idh/MocA family protein [Mycobacterium smegmatis str. MC2.155] | 40.36 | 40.17 | GASVSDFAETTR                         | 1252.62236 | 4.38             | 2.90  |
|           |      |                                                                                    |       |       | YIIAPQGLK                            | 1002.60149 | 3.20             | 1.99  |
|           |      |                                                                                    |       |       | Sequence                             | MH+ [Da]   | $\Delta$ M [ppm] | XCorr |
|           |      |                                                                                    |       |       | AFAHDQLLGTAAAPTFGDAVALHR             | 2450.25968 | 0.83             | 5.43  |
|           |      |                                                                                    |       |       | MTPIGVGVIGASPNGGWALAHVPLLR           | 2612.42264 | 3.64             | 4.68  |
|           |      |                                                                                    |       |       | VPDHYGLITDALTAGK                     | 1670.87578 | 0.54             | 4.53  |
|           |      |                                                                                    |       |       | AVFSEWPLGVALEQAQILHAFAVAVAGVPTWGLQAR | 3726.03843 | 0.13             | 3.98  |
|           |      |                                                                                    |       |       | LIAGIEHVNTESHK                       | 1575.82512 | 0.81             | 3.20  |
|           |      |                                                                                    |       |       | VLSTNIVSSGMAWAPGAPAAQAYAFDAR         | 2792.38547 | 1.02             | 2.65  |
|           |      |                                                                                    |       |       | Sequence                             | MH+ [Da]   | $\Delta$ M [ppm] | XCorr |
| 118472266 | 0255 | phosphoenolpyruvate carboxykinase [Mycobacterium smegmatis str. MC2.155]           | 38.61 | 21.88 | IASAMAHDDEGWLAEHMLLK                 | 2236.13193 | 2.91             | 5.58  |
|           |      |                                                                                    |       |       | LNPEKQPNSTYLAALSDPSDVAR              | 2314.17656 | 3.93             | 4.84  |
|           |      |                                                                                    |       |       | LCAHLVEAGTFQK                        | 1473.75310 | 0.80             | 3.91  |
|           |      |                                                                                    |       |       | TNLAMLQPTIEGWR                       | 1629.84197 | 0.09             | 3.46  |
|           |      |                                                                                    |       |       | TIAAGNTVFTNVAK                       | 1406.77056 | 4.75             | 3.17  |
|           |      |                                                                                    |       |       | VFFVNWFR                             | 1114.58342 | 0.10             | 2.33  |
|           |      |                                                                                    |       |       | TTVPLITEAR                           | 1100.63469 | 3.31             | 2.03  |
|           |      |                                                                                    |       |       | LPTGLKDEFDALK                        | 1446.78467 | 0.50             | 2.34  |
|           |      |                                                                                    |       |       | YITHPEPTR                            | 1163.58551 | 0.95             | 2.21  |
|           |      |                                                                                    |       |       | FLWPGFGENSR                          | 1309.63445 | 1.52             | 1.60  |
|           |      |                                                                                    |       |       | Sequence                             | MH+ [Da]   | $\Delta$ M [ppm] | XCorr |
| 118468832 | 4084 | acyl-CoA dehydrogenase [Mycobacterium smegmatis str. MC2.155]                      | 38.05 | 30.39 | ALADAETVMADGVGDK                     | 1633.77458 | 0.42             | 4.93  |
|           |      |                                                                                    |       |       | ALGDYLVNGNPLPR                       | 1498.80364 | 1.54             | 4.50  |
|           |      |                                                                                    |       |       | LWLDHIVAGDLFGNANTELTAK               | 2398.24344 | 1.33             | 3.74  |
|           |      |                                                                                    |       |       | ELNHTSPVDAFAMIQEAR                   | 2028.98271 | 0.92             | 3.17  |
|           |      |                                                                                    |       |       | AKVTIENLVSAR                         | 1229.72453 | 2.65             | 3.08  |
|           |      |                                                                                    |       |       | LTAGGTAVFDNVR                        | 1350.70952 | 6.11             | 2.61  |
|           |      |                                                                                    |       |       | VTIENLVSAR                           | 1030.58769 | -1.44            | 2.58  |

|           |      |                                                                                     |       |       |                                                                                                                                                                                    |                                                                                                                                        |                                                                                            |                                                                               |
|-----------|------|-------------------------------------------------------------------------------------|-------|-------|------------------------------------------------------------------------------------------------------------------------------------------------------------------------------------|----------------------------------------------------------------------------------------------------------------------------------------|--------------------------------------------------------------------------------------------|-------------------------------------------------------------------------------|
| 118471656 | 6242 | alcohol dehydrogenase, iron-containing<br>[Mycobacterium smegmatis str. MC2<br>155] | 36.19 | 31.91 | VYTHEVIR<br>LATVDPNVAAHALR                                                                                                                                                         | 1163.62200<br>1376.76872                                                                                                               | 1.03<br>3.04                                                                               | 2.27<br>1.80                                                                  |
| 118471823 | 1714 | L-ribulose-5-phosphate 4-epimerase<br>[Mycobacterium smegmatis str. MC2<br>155]     | 31.18 | 32.90 | Sequence<br>NMHTTVQAADAAVEAALR<br>AISEHIQDDWCCTPGNPR<br>LDFAPSLGNALYSVELVAK<br>EVTVESMIPVNHAINESY<br>ALLGVAHDIIGVEAK<br>LAQDVGIPDNFSQVR<br>YAQLATAMGVDTR<br>TLMTTGLR<br>NINEFEFPAK | MH+ [Da]<br>1731.86931<br>1995.90447<br>2007.08245<br>2131.04180<br>1562.89018<br>1658.85161<br>1396.69634<br>1005.57543<br>1168.56352 | $\Delta$ M [ppm]<br>-0.12<br>3.32<br>1.31<br>1.93<br>0.01<br>1.13<br>5.26<br>-0.75<br>0.13 | XCorr<br>5.36<br>4.82<br>4.15<br>3.80<br>3.65<br>3.19<br>2.85<br>2.60<br>1.67 |
| 118468273 | 2750 | iron-dependent repressor Ider<br>[Mycobacterium smegmatis str. MC2<br>155]          | 29.11 | 45.65 | Sequence<br>LLVDVIGLPWEDVHAEADR<br>LDQSGPTVSQTVSR<br>IAERLDQSGPTVSQTVSR<br>LTELPGMPVAVVVR<br>RLVQVLDNPTTSPFGNPIPLGTELGVTGVTGVTEDVSLVR<br>TYDLEEGVPLR                               | MH+ [Da]<br>2192.12114<br>1474.75224<br>1944.01517<br>1579.92571<br>4102.17588<br>1632.84905                                           | $\Delta$ M [ppm]<br>1.91<br>1.75<br>0.30<br>1.01<br>-1.52<br>0.64                          | XCorr<br>3.80<br>3.80<br>3.78<br>3.00<br>3.51<br>2.23                         |
| 302595983 | 6286 | RecName: Full=Putative<br>aminotransferase MSMEG_6286                               | 28.66 | 14.02 | Sequence<br>DAIDGLATALLAATEALLGDK                                                                                                                                                  | MH+ [Da]<br>2202.13291                                                                                                                 | $\Delta$ M [ppm]<br>0.25                                                                   | XCorr<br>5.77                                                                 |

|           |      |                                                                                        |       |       |                                 |            |                  |       |
|-----------|------|----------------------------------------------------------------------------------------|-------|-------|---------------------------------|------------|------------------|-------|
| 118469099 | 3532 | serine/threonine dehydratase<br>[Mycobacterium smegmatis str. MC2 155]                 | 27.70 | 17.41 | GGYFVSLDWWPQTAK                 | 1596.80754 | 1.13             | 2.63  |
|           |      |                                                                                        |       |       | FALVAEILEDK                     | 1275.69438 | -0.01            | 2.36  |
|           |      |                                                                                        |       |       | IAPTTPSLPDVNR                   | 1312.72746 | 1.09             | 1.77  |
| 118473637 | 3061 | primosome assembly protein PriA<br>[Mycobacterium smegmatis str. MC2 155]              | 27.45 | 14.56 | Sequence                        | MH+ [Da]   | $\Delta$ M [ppm] | XCorr |
|           |      |                                                                                        |       |       | IFAVEPELAADTAESLALGSIVEWPVAK    | 2926.54483 | -0.05            | 5.99  |
|           |      |                                                                                        |       |       | LVAEPPGAVSLAGVR                 | 1489.80596 | 3.33             | 3.67  |
|           |      |                                                                                        |       |       | TPLLAADWGDPR                    | 1311.66997 | 0.55             | 1.92  |
|           |      |                                                                                        |       |       | Sequence                        | MH+ [Da]   | $\Delta$ M [ppm] | XCorr |
|           |      |                                                                                        |       |       | DVDALHAAVTAHVPESR               | 1787.90764 | 2.28             | 4.50  |
|           |      |                                                                                        |       |       | ADGGVAVVAESVLPVQALIR            | 2164.24101 | 3.37             | 3.32  |
|           |      |                                                                                        |       |       | TALDADRPVLIQVPR                 | 1663.95169 | 1.58             | 3.22  |
|           |      |                                                                                        |       |       | VVALSAGLGPSAR                   | 1197.69890 | 3.20             | 2.53  |
|           |      |                                                                                        |       |       | LPSMALQAAAR                     | 1057.58599 | 3.45             | 2.49  |
|           |      |                                                                                        |       |       | LVDATFLER                       | 1075.61370 | -0.92            | 2.31  |
|           |      |                                                                                        |       |       | LGPVDLPGFAR                     | 1141.63689 | 0.35             | 2.58  |
| 118473746 | 4668 | oxidoreductase alpha (molybdopterin)<br>subunit [Mycobacterium smegmatis str. MC2 155] | 27.06 | 10.38 | Sequence                        | MH+ [Da]   | $\Delta$ M [ppm] | XCorr |
|           |      |                                                                                        |       |       | APDAFLDALDAHGITPPR              | 2014.00981 | 3.40             | 5.56  |
|           |      |                                                                                        |       |       | GMIKPGAGVGPVR                   | 1398.73432 | -0.16            | 3.11  |
|           |      |                                                                                        |       |       | SEVAIVCQLAR                     | 1245.66130 | -0.60            | 2.79  |
|           |      |                                                                                        |       |       | VVFVNPDIAR                      | 1230.68437 | 0.17             | 2.27  |
|           |      |                                                                                        |       |       | GmIGKPGAGVCPVR                  | 1414.72986 | 0.29             | 2.19  |
|           |      |                                                                                        |       |       | ScNLTQVSTK                      | 1236.62517 | -0.11            | 1.98  |
|           |      |                                                                                        |       |       | VIAINPLPEAGLIR                  | 1475.89067 | -2.60            | 2.25  |
| 118469193 | 3396 | IcR family transcriptional regulator<br>[Mycobacterium smegmatis str. MC2 155]         | 24.95 | 43.41 | Sequence                        | MH+ [Da]   | $\Delta$ M [ppm] | XCorr |
|           |      |                                                                                        |       |       | FLNLTLETQETGVCAAPHISDVADGVAVAVR | 3253.65818 | 1.80             | 5.11  |
|           |      |                                                                                        |       |       | RDELVDLITSHR                    | 1453.77555 | -0.20            | 3.75  |
|           |      |                                                                                        |       |       | LGAPVLLNLMAGR                   | 1445.79460 | 0.82             | 3.01  |

|           |      |                                                                                               |       |       |                           |            |                  |       |
|-----------|------|-----------------------------------------------------------------------------------------------|-------|-------|---------------------------|------------|------------------|-------|
| 118469097 | 5469 | acetyltransferase, GNAT family protein [Mycobacterium smegmatis str. MC2 155]                 | 23.76 | 24.40 | VAGILELAR                 | 1012.61528 | 0.26             | 2.56  |
|           |      |                                                                                               |       |       | TVAAVSVGPHHEIHSR          | 1787.93937 | -0.33            | 2.86  |
|           |      |                                                                                               |       |       | LLDAPLSLQGLVGLVAAGYLDEHRR | 2992.59243 | 2.41             | 2.87  |
| 118471394 | 3517 | HAD-superfamily protein subfamily protein IB hydrolase [Mycobacterium smegmatis str. MC2 155] | 23.72 | 22.42 | Sequence                  | MH+ [Da]   | $\Delta$ M [ppm] | XCorr |
|           |      |                                                                                               |       |       | TGGIATLAALAMGLDHCFTAVQLHR | 2568.28543 | 1.69             | 3.85  |
|           |      |                                                                                               |       |       | VPAGVGLRPVR               | 1219.76323 | -0.16            | 3.17  |
|           |      |                                                                                               |       |       | HAVTSPWPSICGLR            | 1570.78032 | 0.50             | 2.33  |
| 302595980 | 5435 | RecName: Full=Putative ligase MSMEG_5435                                                      | 21.87 | 11.19 | Sequence                  | MH+ [Da]   | $\Delta$ M [ppm] | XCorr |
|           |      |                                                                                               |       |       | AVIIEPFLVATPVLEEK         | 1955.11247 | 1.23             | 3.95  |
|           |      |                                                                                               |       |       | LASLGPLINDLEAR            | 1481.83220 | -0.07            | 3.92  |
|           |      |                                                                                               |       |       | TVTTGMVVTGEPHEPVR         | 1710.85027 | 1.31             | 3.34  |
|           |      |                                                                                               |       |       | GASLTMHLHQPTPR            | 1408.73882 | 1.57             | 3.08  |
|           |      |                                                                                               |       |       | TVTTGmVVTGEPHEPVR         | 1726.84311 | 0.10             | 2.26  |
| 118469401 | 1028 | geranylgeranyl reductase [Mycobacterium smegmatis str. MC2 155]                               | 17.57 | 11.14 | Sequence                  | MH+ [Da]   | $\Delta$ M [ppm] | XCorr |
|           |      |                                                                                               |       |       | VYGDVAIAADGAYSPIKR        | 1865.98638 | 5.74             | 4.67  |
|           |      |                                                                                               |       |       | VTVFSPSEWELSFPR           | 1780.89287 | 1.31             | 3.83  |
|           |      |                                                                                               |       |       | VVLDKAEFPR                | 1272.73540 | 3.36             | 3.08  |
| 118468008 | 0402 | linear gramicidin synthetase subunit D [Mycobacterium smegmatis str. MC2 155]                 | 17.06 | 2.74  | Sequence                  | MH+ [Da]   | $\Delta$ M [ppm] | XCorr |
|           |      |                                                                                               |       |       | LVGYTTGTADPPAAR           | 1475.79045 | 3.46             | 3.37  |
|           |      |                                                                                               |       |       | APDAVALVSGDR              | 1170.61638 | 4.25             | 2.96  |
|           |      |                                                                                               |       |       | LVGYTTGTADPPAQLR          | 1574.85454 | 0.50             | 2.87  |
|           |      |                                                                                               |       |       | GGGGGLTPSDVAPAR           | 1311.66570 | 0.35             | 2.33  |



|           |      |                                                                                      |       |       |               |            |                  |       |
|-----------|------|--------------------------------------------------------------------------------------|-------|-------|---------------|------------|------------------|-------|
| 118473001 | 3200 | L-aspartate oxidase [Mycobacterium smegmatis str. MC2 155]                           | 16.10 | 9.42  | SGEAILSLISVLK | 1329.80046 | 1.20             | 2.54  |
|           |      | Sequence                                                                             |       |       |               | MH+ [Da]   | $\Delta M$ [ppm] | XCorr |
|           |      | LAATGDPcVYLDAR                                                                       |       |       |               | 1521.74260 | 3.89             | 3.80  |
|           |      | TDVWVIGTGVAAGLVAALAAHR                                                               |       |       |               | 1990.14548 | 0.49             | 3.27  |
|           |      | LASNILLEGLVWGSR                                                                      |       |       |               | 1514.85588 | 1.40             | 2.95  |
| 118473338 | 5181 | IS1549, transposase [Mycobacterium smegmatis str. MC2 155]                           | 14.76 | 10.86 | Sequence      | MH+ [Da]   | $\Delta M$ [ppm] | XCorr |
|           |      | NIEHVGSAHDEAEALAK                                                                    |       |       |               | 1903.95549 | 2.40             | 4.10  |
|           |      | VLTEVGVPEPASYATVK                                                                    |       |       |               | 1662.90288 | 4.77             | 3.01  |
|           |      | LPIYAQPQWR                                                                           |       |       |               | 1271.68022 | -7.34            | 2.76  |
|           |      | IPFLPDVVR                                                                            |       |       |               | 1055.62505 | 0.19             | 2.02  |
| 118472674 | 6519 | pyridoxamine 5'-phosphate oxidase [Mycobacterium smegmatis str. MC2 155]             | 14.51 | 14.29 | Sequence      | MH+ [Da]   | $\Delta M$ [ppm] | XCorr |
|           |      | ASIAIVAPSAESDPLASAR                                                                  |       |       |               | 1825.96611 | 0.32             | 4.23  |
|           |      | VTLAGVAERPEGDELLAAR                                                                  |       |       |               | 1925.01641 | 3.95             | 4.10  |
| 118472433 | 6284 | cyclopropane-fatty-acyl-phospholipid synthase [Mycobacterium smegmatis str. MC2 155] | 14.20 | 21.51 | Sequence      | MH+ [Da]   | $\Delta M$ [ppm] | XCorr |
|           |      | AVVSGDLEPHGVHPGDPYLLR                                                                |       |       |               | 2389.19803 | 1.85             | 3.66  |
|           |      | IITEAQDVGLVHHEENLR                                                                   |       |       |               | 2178.14005 | -0.07            | 2.99  |
|           |      | SGIEHLKPIAPPPQEEALPR                                                                 |       |       |               | 2163.22807 | -0.22            | 2.94  |
|           |      | LGFETNWWQLHQVLAVK                                                                    |       |       |               | 1895.07584 | 0.45             | 2.46  |
|           |      | GTTYLATAPGDGLLAR                                                                     |       |       |               | 1576.83330 | 0.18             | 2.14  |
| 118470142 | 2293 | hypothetical protein MSMEG_2293 [Mycobacterium smegmatis str. MC2 155]               | 12.47 | 14.72 | Sequence      | MH+ [Da]   | $\Delta M$ [ppm] | XCorr |
|           |      | TPVLSDDGSDLAADVQTIIIEAGLDLQQR                                                        |       |       |               | 2883.47715 | 6.52             | 3.98  |
|           |      | TPSAFTLDPEIKR                                                                        |       |       |               | 1474.79551 | 3.67             | 2.18  |
|           |      | EAVFAGPVLRPSSTLVVR                                                                   |       |       |               | 1799.01982 | 1.30             | 2.37  |
| 118472727 | 4029 | hypothetical protein MSMEG_4029 [Mycobacterium smegmatis str. MC2 155]               | 12.34 | 20.40 | Sequence      | MH+ [Da]   | $\Delta M$ [ppm] | XCorr |
|           |      | VDEPAPLALANTLWIDR                                                                    |       |       |               | 1894.00749 | 0.27             | 4.34  |
|           |      | LDVRRPAPGSTDGLR                                                                      |       |       |               | 1453.77582 | -0.02            | 2.42  |

|           |      |                                                                                                          |       |       |                               |            |                  |       |
|-----------|------|----------------------------------------------------------------------------------------------------------|-------|-------|-------------------------------|------------|------------------|-------|
| 118468233 | 3132 | DNA-binding protein [Mycobacterium smegmatis str. MC2 155]                                               | 11.31 | 9.74  | QAIELATSPR                    | 1085.59538 | 0.35             | 2.21  |
|           |      |                                                                                                          |       |       | Sequence                      | MH+ [Da]   | $\Delta M$ [ppm] | XCorr |
|           |      |                                                                                                          |       |       | ERPSPQVLDALAR                 | 1469.77239 | 1.11             | 2.49  |
|           |      |                                                                                                          |       |       | LSPSFAHGGNPLR                 | 1352.71074 | 2.75             | 2.34  |
| 118471885 | 4042 | GnR family transcriptional regulator [Mycobacterium smegmatis str. MC2 155]                              | 7.55  | 13.49 | Sequence                      | MH+ [Da]   | $\Delta M$ [ppm] | XCorr |
|           |      |                                                                                                          |       |       | LQSEGLVQLVR                   | 1241.72234 | 0.86             | 2.42  |
|           |      |                                                                                                          |       |       | EDEVTAEAGVSR                  | 1262.58635 | 0.30             | 2.32  |
|           |      |                                                                                                          |       |       | LELEQAFHHR                    | 1350.69682 | 4.05             | 2.82  |
| 118469328 | 4124 | hypothetical protein MSMEG_4124 [Mycobacterium smegmatis str. MC2 155]                                   | 7.49  | 15.19 | Sequence                      | MH+ [Da]   | $\Delta M$ [ppm] | XCorr |
|           |      |                                                                                                          |       |       | LQPALAVQSGVSATLAAAAGLR        | 2065.17844 | 0.92             | 3.96  |
|           |      |                                                                                                          |       |       | VAAHPGLAVIPVAVALTEDTWNDRPSEDR | 3186.62912 | 3.50             | 3.53  |
|           |      |                                                                                                          |       |       | SLAVVAFR                      | 834.48546  | 2.64             | 1.58  |
| 118467565 | 2271 | hydrogenase accessory protein HybB [Mycobacterium smegmatis str. MC2 155]                                | 6.53  | 6.18  | Sequence                      | MH+ [Da]   | $\Delta M$ [ppm] | XCorr |
|           |      |                                                                                                          |       |       | VREVPPTTEILPVSAR              | 1781.00090 | 5.19             | 4.33  |
|           |      |                                                                                                          |       |       | EVNPTTEILPVSAR                | 1525.82353 | 0.93             | 2.20  |
| 118472927 | 3773 | acetylornithine aminotransferase [Mycobacterium smegmatis str. MC2 155]                                  | 6.47  | 7.95  | Sequence                      | MH+ [Da]   | $\Delta M$ [ppm] | XCorr |
|           |      |                                                                                                          |       |       | DAGFLVMAAPEVVR                | 1528.81291 | 0.66             | 3.50  |
|           |      |                                                                                                          |       |       | VFGNSGTEANEVAFK               | 1819.83257 | 0.29             | 2.97  |
| 118471393 | 0022 | L-ornithine 5-monoxygenase [Mycobacterium smegmatis str. MC2 155]                                        | 5.82  | 7.05  | Sequence                      | MH+ [Da]   | $\Delta M$ [ppm] | XCorr |
|           |      |                                                                                                          |       |       | VFDPAVDVDDFFVADPAVR           | 1994.95415 | 2.30             | 3.46  |
|           |      |                                                                                                          |       |       | SGEILLESVITHTR                | 1441.77729 | 8.81             | 2.37  |
| 302595893 | 1843 | RecName: Full=Adenosylhomocysteinase; AltName: Full=S-adenosyl-L-homocysteine hydrolase; Short=AdoHcyase | 4.62  | 7.22  | Sequence                      | MH+ [Da]   | $\Delta M$ [ppm] | XCorr |



Table S2 – stationary phase pupylome

| Accession | MSMEG | Description                                                                                           | Score     | Coverage | Sequence                                                                                                                                                                                                                                                                                                                                                                                                                                          | MH+ [Da]                                                                                                                                                                                                                                                             | $\Delta$ M [ppm]                                                                                                                                                  | XCorr                                                                                                                                                 |
|-----------|-------|-------------------------------------------------------------------------------------------------------|-----------|----------|---------------------------------------------------------------------------------------------------------------------------------------------------------------------------------------------------------------------------------------------------------------------------------------------------------------------------------------------------------------------------------------------------------------------------------------------------|----------------------------------------------------------------------------------------------------------------------------------------------------------------------------------------------------------------------------------------------------------------------|-------------------------------------------------------------------------------------------------------------------------------------------------------------------|-------------------------------------------------------------------------------------------------------------------------------------------------------|
| 259546730 | 3896  | RecName: Full=Prokaryotic ubiquitin-like protein Pup; AltName: Full=Bacterial ubiquitin-like modifier | 500.85    | 76.56    | EKLTEETDILLDEIDVLEENAEDFVR<br>LTEETDILLDEIDVLEENAEDFVR<br>RGGGGGEDDDLPGASAAGQERR<br>RGGGGGEDDDLPGASAAGQER<br>RGGGGGEDDDLPGASAAGQER<br>GGGGGGEDDDLPGASAAGQERR                                                                                                                                                                                                                                                                                      | 3194.48362<br>2937.34220<br>2127.97556<br>1815.77287<br>1971.87590<br>1971.87577                                                                                                                                                                                     | 2.74<br>1.67<br>-0.37<br>-0.68<br>0.34<br>0.27                                                                                                                    | 6.00<br>5.26<br>4.55<br>4.28<br>4.24<br>3.01                                                                                                          |
| 300680919 | 3897  | RecName: Full=Pup deamidase/deupylase; AltName: Full=Deamidase of protein Pup                         | 271.96191 | 70.28    | Sequence<br>LYVDHAPHPEXSAPECTDPPMDAVIWDK<br>LHVIGDANLAEITSTYLK<br>LGTTSLVLDIEEGVLDLSDLALARPVHAVHVISR<br>ASHVIETWANVLDLERRDPMCEAELLDWPAK<br>QTPFSAVIAGLTPFMVSR<br>VGIGPSGDEPGFQLSQRR<br>AHVGAALLDSVDSAVELVEQLTN<br>LHLVDLQYSDVRLDK<br>RLVTEQOVLDAVENPPTDTR<br>LVTEQOVLDAVENPPTDTR<br>LHLVDLQYSDVVR<br>LGTTSLVLDIEEGVLDLSDLALARPVHAVHVISRDPSSLR<br>TRWDYEVESPLR<br>GASYSGHENYLMVSR<br>QRENLTWQAPR<br>GIINTRDEPHADADKYYR<br>ELTALALQR<br>IPTLEPLRGSK | MH+ [Da]<br>3059.37119<br>1958.06987<br>3609.00234<br>3621.77268<br>1922.02373<br>1743.87419<br>2280.17070<br>1813.98857<br>2281.18869<br>2125.08183<br>1457.78105<br>4177.30309<br>1550.76653<br>1571.69316<br>1398.72498<br>1970.96866<br>1014.59850<br>1210.71831 | $\Delta$ M [ppm]<br>5.26<br>5.35<br>0.32<br>0.24<br>1.66<br>4.62<br>-0.52<br>4.32<br>4.53<br>2.16<br>4.32<br>1.19<br>4.31<br>1.53<br>0.89<br>0.36<br>4.17<br>2.35 | XCorr<br>6.47<br>6.07<br>5.58<br>5.42<br>5.09<br>4.70<br>4.52<br>4.21<br>3.87<br>3.77<br>3.50<br>3.28<br>3.26<br>3.25<br>3.07<br>2.78<br>2.68<br>2.61 |

| 118471656 | 6242 | alcohol dehydrogenase, iron-containing<br>[Mycobacterium smegmatis str. MC2 155] | 247.35 | 47.99 |                                                 |            |                  |       |  |
|-----------|------|----------------------------------------------------------------------------------|--------|-------|-------------------------------------------------|------------|------------------|-------|--|
|           |      |                                                                                  |        |       | ENLITWQAPR                                      | 1114.56694 | 2.61             | 2.38  |  |
|           |      |                                                                                  |        |       | WDYEVEEPLR                                      | 1293.61699 | 4.60             | 2.30  |  |
|           |      |                                                                                  |        |       | IPITLEPLR                                       | 938.57054  | 3.78             | 1.70  |  |
|           |      |                                                                                  |        |       | GASYSHENYLNMR                                   | 1587.68589 | 0.13             | 1.59  |  |
|           |      |                                                                                  |        |       | LLEGFR                                          | 734.42241  | 3.84             | 1.43  |  |
|           |      |                                                                                  |        |       | SSGPPPIVDADEVGAANMILTINGAR                      | 2452.21611 | 0.94             | 1.30  |  |
|           |      |                                                                                  |        |       | IIGTEVEYGISSPSDPTANPILITSTQAVLAVYAAAAAGIQR      |            | 2.46             | 2.06  |  |
| 118471656 | 4323 | pyruvate dehydrogenase subunit E1<br>[Mycobacterium smegmatis str. MC2 155]      | 195.53 | 45.96 |                                                 |            |                  |       |  |
|           |      |                                                                                  |        |       | LDFAPSLGNALYSVELVAK                             | 2007.08054 | 0.36             | 6.01  |  |
|           |      |                                                                                  |        |       | NMHTTVQAADDAVEAALR                              | 1731.86992 | 0.24             | 5.49  |  |
|           |      |                                                                                  |        |       | EGMMAQAQYAGQAFNSGGLGIVHSISHAVSAFFDSHHGLNNALALPR | 4907.39545 | 1.21             | 5.07  |  |
|           |      |                                                                                  |        |       | AISEHIQDDWCTPGNPR                               | 1995.90679 | 4.48             | 4.66  |  |
|           |      |                                                                                  |        |       | EVTVESMIPVNVHAINESY                             | 2131.04009 | 1.13             | 4.48  |  |
|           |      |                                                                                  |        |       | ALLGVGAHDIIGVEAK                                | 1562.89690 | 4.31             | 4.14  |  |
|           |      |                                                                                  |        |       | EgMMAQAQYAGQAFNSGGLGIVHSISHAVSAFFDSHHGLNNALALPR | 4923.39918 | 2.99             | 3.87  |  |
|           |      |                                                                                  |        |       | LAQDVIGIPDNFSQVR                                | 1658.85723 | 4.51             | 3.37  |  |
|           |      |                                                                                  |        |       | YAQLATAmGVDTR                                   | 1412.68608 | 1.54             | 3.13  |  |
|           |      |                                                                                  |        |       | RTLMTTGLR                                       | 1161.68132 | 3.46             | 2.92  |  |
|           |      |                                                                                  |        |       | YAQLATAmGVDTR                                   | 1396.69487 | 4.21             | 2.81  |  |
|           |      |                                                                                  |        |       | GSGIIEELTGK                                     | 1103.59502 | 0.61             | 2.51  |  |
|           |      |                                                                                  |        |       | TLLMTTGLR                                       | 1005.57964 | 3.44             | 2.42  |  |
|           |      |                                                                                  |        |       | VWEYNLPAR                                       | 1147.59453 | 4.37             | 2.24  |  |
|           |      |                                                                                  |        |       | TLLmTTGLR                                       | 1021.57506 | 3.88             | 2.04  |  |
|           |      |                                                                                  |        |       | NINEFEFGAK                                      | 1168.56767 | 3.68             | 1.87  |  |
|           |      |                                                                                  |        |       | Sequence                                        | MH+ [Da]   | $\Delta$ M [ppm] | XCorr |  |
|           |      |                                                                                  |        |       | GLIQVAANEALDNLTFVINCILQR                        | 2686.40036 | 0.79             | 6.39  |  |
|           |      |                                                                                  |        |       | YFNTDAESVVAVLQGLAR                              | 2052.07988 | 1.83             | 5.23  |  |
|           |      |                                                                                  |        |       | VPVSDAQLIEDPYLPYYHHPGPEAPEIR                    | 3178.54831 | 3.59             | 5.14  |  |
|           |      |                                                                                  |        |       | LRHPDEPAGTPHYTSALADDAAGPVIASDWMR                | 3337.67683 | 0.61             | 4.84  |  |
|           |      |                                                                                  |        |       | RYFNTDAESVVAVLQGLAR                             | 2208.18047 | 1.46             | 4.32  |  |
|           |      |                                                                                  |        |       | TKALVADMSDQEIWLKRR                              | 2361.19754 | 4.54             | 4.20  |  |



| 302595855 | 2621 | RecName: Full=Prolyl-tRNA synthetase;<br>AltName: Full=Proline--tRNA ligase;<br>Short=ProRS | 153.35 | 50.43 |                                             |            |                  |       |  |
|-----------|------|---------------------------------------------------------------------------------------------|--------|-------|---------------------------------------------|------------|------------------|-------|--|
|           |      |                                                                                             |        |       | GFQSIHESDMILLPPDNTAR                        | 2259.05718 | 1.68             | 3.63  |  |
|           |      |                                                                                             |        |       | TLNMNFVHDPFTR                               | 1738.83818 | 0.64             | 3.47  |  |
|           |      |                                                                                             |        |       | LVPGEAPINLVYSQR                             | 1818.97666 | 0.95             | 2.96  |  |
|           |      |                                                                                             |        |       | ENEIMPIQRPHPEFSLYYDV                        | 2753.33159 | 1.29             | 2.74  |  |
| 302595983 | 6286 | RecName: Full=Putative aminotransferase<br>MSMEG_6286                                       | 141.06 | 50.23 |                                             |            |                  |       |  |
|           |      |                                                                                             |        |       | Sequence                                    | MH+ [Da]   | $\Delta$ M [ppm] | XCorr |  |
|           |      |                                                                                             |        |       | LMWDNAYAVHTLTDFEVEPVDIQLAAAAAGNPNRPLVFASTSK | 4600.31357 | -1.03            | 7.17  |  |
|           |      |                                                                                             |        |       | HFATTESFGIENVVPIREDGPDVDVIEQLVASDPTTK       | 4147.12387 | 0.07             | 6.11  |  |
|           |      |                                                                                             |        |       | DAIDGLATCALLAATEALLGDK                      | 2202.13346 | 0.50             | 6.03  |  |
|           |      |                                                                                             |        |       | HVVGLVAGR                                   | 907.54698  | -0.31            | 1.75  |  |
|           |      |                                                                                             |        |       | MSEFLR                                      | 895.47368  | 3.38             | 2.28  |  |
|           |      |                                                                                             |        |       | DFTPPDGTTEAAEVR                             | 1520.72856 | 3.78             | 2.34  |  |
|           |      |                                                                                             |        |       | WTEYGDTLFR                                  | 1287.60430 | 2.97             | 2.44  |  |
|           |      |                                                                                             |        |       | GMADGVVELR                                  | 1101.57329 | 4.07             | 2.45  |  |
|           |      |                                                                                             |        |       | SEMNAIQAQELLPLALLPR                         | 2036.12546 | 2.20             | 3.12  |  |
|           |      |                                                                                             |        |       | GIEIGHIFQLGR                                | 1339.75054 | 1.77             | 3.13  |  |
|           |      |                                                                                             |        |       | RLGALEPAEFALLDDADFAANPELVK                  | 2874.51836 | 5.07             | 3.17  |  |
|           |      |                                                                                             |        |       | AGAAELVADLDR                                | 1200.62724 | 4.39             | 3.51  |  |
|           |      |                                                                                             |        |       | NNDYLLGPTHEELFTLVK                          | 2204.12473 | 0.58             | 3.63  |  |
|           |      |                                                                                             |        |       | DGDPSPDGAGVLT SAR                           | 1514.70989 | 1.09             | 3.65  |  |
|           |      |                                                                                             |        |       | APEAQPTTEGLPEAK                             | 1437.72270 | 0.43             | 3.67  |  |
|           |      |                                                                                             |        |       | WPSSVAPFDVHVWVANK                           | 1851.97593 | 0.35             | 3.69  |  |
|           |      |                                                                                             |        |       | VYDTPDTPTIATLVWANSASLPQFEGR                 | 3078.50932 | 1.21             | 3.76  |  |
|           |      |                                                                                             |        |       | AGAAELVADLDRLGHEVLFDDR                      | 2382.20670 | 0.73             | 3.86  |  |
|           |      |                                                                                             |        |       | AVPGIYSWLPGLR                               | 1598.90434 | -0.66            | 4.24  |  |
|           |      |                                                                                             |        |       | AGAAELVADLDRLGHEVLFDDRQASPGVK               | 3049.57046 | 0.05             | 4.41  |  |
|           |      |                                                                                             |        |       | VHGSSWITGADAPNR                             | 1666.83158 | 1.14             | 4.44  |  |
|           |      |                                                                                             |        |       | FKDAELLGMPVIVVGR                            | 1930.06243 | 0.21             | 4.54  |  |
|           |      |                                                                                             |        |       | LVAVIAEQHQDQLGLR                            | 1790.00127 | 5.18             | 4.71  |  |
|           |      |                                                                                             |        |       | LGALEPAEFALLDDADFAANPELVK                   | 2718.40434 | 0.62             | 4.98  |  |

|           |      |                                                                                 |        |       |                                       |            |                  |       |
|-----------|------|---------------------------------------------------------------------------------|--------|-------|---------------------------------------|------------|------------------|-------|
| 118468273 | 2750 | Iron-dependent repressor IdeR<br>[Mycobacterium smegmatis str. MC2 155]         | 126.68 | 76.52 | IAPTFPSLPDVRDAIDGLATCALLAATEALLGDK    | 3495.84775 | 2.06             | 5.60  |
|           |      |                                                                                 |        |       | ITFAGAGV/SFLGASADNIAWYLK              | 2372.23369 | 2.14             | 4.74  |
|           |      |                                                                                 |        |       | GIWCVPVYSNPTGATVSTDVIR                | 2456.19414 | 1.05             | 4.54  |
|           |      |                                                                                 |        |       | DAGIAVTEAGSAPFYRK                     | 1752.90056 | 5.11             | 3.87  |
|           |      |                                                                                 |        |       | GGYFVSLDVWPGTAK                       | 1596.80657 | 0.52             | 3.39  |
|           |      |                                                                                 |        |       | NYGGVQGLPELR                          | 1302.68572 | 4.29             | 2.90  |
|           |      |                                                                                 |        |       | FALVAEILEDNR                          | 1275.69560 | 0.94             | 2.87  |
|           |      |                                                                                 |        |       | DAGIAVTEAGSAPFYRK                     | 1624.80388 | 4.46             | 2.79  |
|           |      |                                                                                 |        |       | IAPTFPSLPDVR                          | 1312.72612 | 0.07             | 1.93  |
| 118468231 | 0817 | LysR family transcriptional regulator<br>[Mycobacterium smegmatis str. MC2 155] | 76.80  | 61.56 |                                       |            |                  |       |
|           |      |                                                                                 |        |       | Sequence                              | MH+ [Da]   | $\Delta$ M [ppm] | XCorr |
|           |      |                                                                                 |        |       | AEREELVGLVGIFFSPIAFHAPNILTAVEK        | 3431.86008 | 0.75             | 8.31  |
|           |      |                                                                                 |        |       | AAALDLNVTQSTLSAIIHQLEK                | 2322.24224 | 0.40             | 4.94  |
|           |      |                                                                                 |        |       | RLVQVLDNPPTSPFGNPIPGLTELGVTGVTEDVSLVR | 4102.18613 | 0.98             | 6.63  |
|           |      |                                                                                 |        |       | MNDLVDITTEMYLR                        | 1600.73955 | 3.07             | 4.33  |
|           |      |                                                                                 |        |       | LVQVLDNPPTSPFGNPIPGLTELGVTGVTEDVSLVR  | 3946.09047 | 2.41             | 4.17  |
|           |      |                                                                                 |        |       | IAERLDQSGPTVSQTVSR                    | 1944.01627 | 0.87             | 3.79  |
|           |      |                                                                                 |        |       | mNDLVDITTEMYLR                        | 1616.73210 | 1.58             | 3.46  |
|           |      |                                                                                 |        |       | LDQSGPTVSQTVSR                        | 1474.75005 | 0.26             | 3.38  |
|           |      |                                                                                 |        |       | WEHVMSEEVER                           | 1430.63898 | 1.41             | 3.29  |
|           |      |                                                                                 |        |       | LLVDVIGLPWEDVHAEACR                   | 2192.11943 | 1.13             | 3.18  |
|           |      |                                                                                 |        |       | LTELPVGMPPAVVWR                       | 1579.92313 | -0.62            | 3.14  |
|           |      |                                                                                 |        |       | LLVDVIGLPWEDVHAEACRWEHVMSEEVER        | 3603.74494 | 2.46             | 3.03  |
|           |      |                                                                                 |        |       | WEHVMSEEVER                           | 1586.73931 | 0.77             | 2.79  |
|           |      |                                                                                 |        |       | LTELPVGMPPAVVWR                       | 1595.92583 | 4.26             | 2.68  |
|           |      |                                                                                 |        |       | QLTEHVOGDTDLIGR                       | 1681.85392 | 2.05             | 2.67  |
|           |      |                                                                                 |        |       | LKEAGVPPNAR                           | 1153.66863 | -0.19            | 2.61  |
|           |      |                                                                                 |        |       | TTYDLEEGVPLR                          | 1632.85039 | 1.46             | 2.28  |
|           |      |                                                                                 |        |       | MERDGLLHVAGDR                         | 1468.73638 | 2.56             | 2.24  |
|           |      |                                                                                 |        |       | ALAVAVMR                              | 830.49486  | 3.77             | 1.95  |
|           |      |                                                                                 |        |       | DGLLHVAGDR                            | 1052.55036 | 1.87             | 1.50  |



| 118471676 | 3143 | aconitate hydratase 1 [Mycobacterium smegmatis str. MC2 155] | 76.60 | 30.01 |                                             |            |                  |       |
|-----------|------|--------------------------------------------------------------|-------|-------|---------------------------------------------|------------|------------------|-------|
|           |      |                                                              |       |       | IRHPVSGYETVR                                | 1463.77457 | -0.58            | 4.84  |
|           |      |                                                              |       |       | IVALELADDVPIEVLVR                           | 2060.20244 | 1.04             | 4.50  |
|           |      |                                                              |       |       | AAHPQRPVHLRDFEDEFVLLDLK                     | 2815.44546 | 1.41             | 3.56  |
|           |      |                                                              |       |       | SVVGLGQGSVNLNR                              | 1512.78728 | 4.44             | 3.49  |
|           |      |                                                              |       |       | TVLEDADQLYQSVR                              | 1636.82134 | 2.19             | 3.41  |
|           |      |                                                              |       |       | LTFLEGDQETLMR                               | 1552.76921 | 1.01             | 2.63  |
|           |      |                                                              |       |       | DFEDEFVLLDLK                                | 1579.78996 | 0.55             | 2.50  |
|           |      |                                                              |       |       | IPPHVIVSADHPR                               | 1437.79641 | 0.16             | 2.38  |
|           |      |                                                              |       |       | EVGAELFQR                                   | 1048.54595 | 3.53             | 2.13  |
|           |      |                                                              |       |       | SFTLVQLR                                    | 963.56633  | 4.26             | 1.88  |
|           |      |                                                              |       |       | EYVLDFIKR                                   | 1246.64824 | 1.25             | 1.64  |
|           |      |                                                              |       |       | Sequence                                    | MH+ [Da]   | $\Delta$ M [ppm] | XCorr |
|           |      |                                                              |       |       | EAVVAALGGDPNKKVNP LAPAELVIDHSVILDVFGNASAFER | 4116.14902 | 2.13             | 6.84  |
|           |      |                                                              |       |       | LSGEIKPGVTATDVVLTVTDMLR                     | 2415.32207 | 2.32             | 5.46  |
|           |      |                                                              |       |       | KAPYFDGMPAEPPEVSDIK                         | 2091.02178 | 5.43             | 4.72  |
|           |      |                                                              |       |       | AINDDLAVTAVLSGMR                            | 1742.90532 | 1.19             | 3.99  |
|           |      |                                                              |       |       | TNMAPPGSQVWTDYYNKK                          | 1787.83440 | 4.18             | 3.91  |
|           |      |                                                              |       |       | VIMQDFTGVPcIvDLATMR                         | 2166.07915 | 1.59             | 3.66  |
|           |      |                                                              |       |       | TDEQLALVEAYAK                               | 1450.74932 | 4.72             | 3.37  |
|           |      |                                                              |       |       | SLPTPEGDTFEWDPASTYVR                        | 2268.05351 | 3.48             | 3.32  |
|           |      |                                                              |       |       | NQLLDDVSSGGYTR                              | 1437.70256 | 3.94             | 3.21  |
|           |      |                                                              |       |       | NGGILQYVLR                                  | 1132.64885 | 1.32             | 2.93  |
|           |      |                                                              |       |       | DIHNVV/EQNHPTPETK                           | 1921.90354 | -0.20            | 2.83  |
|           |      |                                                              |       |       | GVAEPLANR                                   | 1025.57549 | 1.57             | 2.74  |
|           |      |                                                              |       |       | LNAVPGTEKLPYSLK                             | 1629.92803 | 4.25             | 2.58  |
|           |      |                                                              |       |       | IDTPEGADYYR                                 | 1299.58513 | -0.06            | 2.37  |
|           |      |                                                              |       |       | LSGEIKPGVTATDVVLTVTDMLR                     | 2571.41800 | 0.16             | 2.36  |
|           |      |                                                              |       |       | AGIPLVVLGGK                                 | 1023.65666 | 0.49             | 2.07  |
|           |      |                                                              |       |       | VLAENLLR                                    | 927.56603  | 4.08             | 1.92  |
|           |      |                                                              |       |       | EMFTESYADVFK                                | 1466.65361 | 1.87             | 1.43  |
|           |      |                                                              |       |       | AGLWPLYEK                                   | 1076.57854 | 0.92             | 1.31  |

| 118472725 | 0759 | adenylosuccinate synthetase<br>[Mycobacterium smegmatis str. MC2 155]        | 62.95 | 38.05 |                                  |            |                  |       |
|-----------|------|------------------------------------------------------------------------------|-------|-------|----------------------------------|------------|------------------|-------|
|           |      |                                                                              |       |       | ALEPAEVLNLEEQAEGRK               | MH+ [Da]   | $\Delta$ M [ppm] | XCorr |
|           |      |                                                                              |       |       | VADVLDEQYLAEKIEALEFK             | 2100.08574 | -0.14            | 5.52  |
|           |      |                                                                              |       |       | AEPVVEELPGWWEIDISGAR             | 2330.25298 | 1.66             | 5.16  |
|           |      |                                                                              |       |       | RVDMPMTQSDIAR                    | 2204.03374 | 1.89             | 4.43  |
|           |      |                                                                              |       |       | KALEPAEVLNLEEQAEGRK              | 1648.78105 | 1.70             | 4.29  |
|           |      |                                                                              |       |       | VNGITDYELTK                      | 2228.18364 | 1.18             | 4.15  |
|           |      |                                                                              |       |       | LDLSSLETVPVCGYTYVDGK             | 1270.66887 | 0.83             | 2.82  |
|           |      |                                                                              |       |       | ITTVLGIK                         | 2251.15727 | 2.02             | 2.09  |
|           |      |                                                                              |       |       | VSSGPPTELFDEHGAYLAK              | 957.63555  | 1.26             | 1.92  |
|           |      |                                                                              |       |       | GVDTSNLLISADAHLLMPYHVALDKVER     | 2135.05021 | 2.68             | 1.57  |
|           |      |                                                                              |       |       |                                  | 3176.68348 | 1.92             | 1.37  |
| 118467565 | 2271 | hydrogenase accessory protein HyrB<br>[Mycobacterium smegmatis str. MC2 155] | 59.49 | 41.70 |                                  |            |                  |       |
|           |      |                                                                              |       |       | ALQGLDLTRLDLVIENWGLVCPAEFDVGEHAK | MH+ [Da]   | $\Delta$ M [ppm] | XCorr |
|           |      |                                                                              |       |       | VREVNPTTEILPVSAR                 | 3718.94858 | 0.30             | 6.83  |
|           |      |                                                                              |       |       | LDLVIENWGLVCPAEFDVGEHAK          | 1780.99980 | 4.57             | 4.82  |
|           |      |                                                                              |       |       | IEVLESIFAEINDIR                  | 2751.40262 | 0.10             | 3.45  |
|           |      |                                                                              |       |       | VMVYSVTEGEDKPLKVPVMFR            | 1647.86199 | 1.87             | 3.10  |
|           |      |                                                                              |       |       | EVNPTTEILPVSAR                   | 2488.27365 | 4.85             | 2.95  |
|           |      |                                                                              |       |       | TGEGMEAWVDWLR                    | 1525.83013 | 5.25             | 2.89  |
|           |      |                                                                              |       |       | AVDVLINK                         | 1613.70659 | 0.75             | 2.85  |
|           |      |                                                                              |       |       | ALQGLDLTR                        | 970.59673  | 3.62             | 2.59  |
|           |      |                                                                              |       |       | TGEGMEAWVDWLRR                   | 986.56688  | 3.96             | 2.27  |
|           |      |                                                                              |       |       |                                  | 1769.80808 | 0.89             | 2.00  |
| 118468832 | 4084 | acyl-CoA dehydrogenase [Mycobacterium<br>smegmatis str. MC2 155]             | 54.84 | 46.23 |                                  |            |                  |       |
|           |      |                                                                              |       |       | ALADAAETVMADGVGDK                | MH+ [Da]   | $\Delta$ M [ppm] | XCorr |
|           |      |                                                                              |       |       | TFAHGVSSAKDDPLLQHWVGGQLASDAFAFR  | 1633.78093 | 4.31             | 4.97  |
|           |      |                                                                              |       |       | QAGHVDGYGSPMAQLYLTAVTLAGLLEAINR  | 3151.59707 | 1.58             | 4.31  |
|           |      |                                                                              |       |       | ALGDYLVNIGNPLPR                  | 3116.58652 | 0.98             | 4.27  |
|           |      |                                                                              |       |       | LTASGTAVFDNVR                    | 1498.80937 | 5.37             | 4.19  |
|           |      |                                                                              |       |       | VTIENLVSRR                       | 1350.70867 | 5.47             | 3.07  |
|           |      |                                                                              |       |       | LATVDPNVVAHALR                   | 1030.59197 | 2.70             | 2.71  |
|           |      |                                                                              |       |       |                                  | 1376.76848 | 2.86             | 2.67  |

|           |      |                                                                                          |       |       |                                      |            |                  |       |
|-----------|------|------------------------------------------------------------------------------------------|-------|-------|--------------------------------------|------------|------------------|-------|
| 118467594 | 1543 | eptc-inducible aldehyde dehydrogenase<br>[Mycobacterium smegmatis str. MC2 155]          | 53.29 | 34.82 | AKVTIENLVSR                          | 1229.72612 | 3.94             | 2.57  |
|           |      |                                                                                          |       |       | LWLDHIVAGDLFGNANTELTAK               | 2398.25333 | 5.45             | 2.47  |
|           |      |                                                                                          |       |       | VYTHEVFIR                            | 1163.62212 | 1.13             | 2.42  |
|           |      |                                                                                          |       |       | EINHTSPVDAFAMIQEAR                   | 2028.98453 | 1.81             | 2.11  |
|           |      |                                                                                          |       |       | Sequence                             | MH+ [Da]   | $\Delta$ M [ppm] | XCorr |
|           |      |                                                                                          |       |       | SPNIFNNVLAQADDYQDK                   | 2199.03569 | 0.15             | 5.66  |
|           |      |                                                                                          |       |       | SLIQSDIDEFLELAIR                     | 2080.09551 | -0.33            | 5.59  |
|           |      |                                                                                          |       |       | VWITNCYHQYPAHAAFGYK                  | 2270.03325 | 4.22             | 5.30  |
|           |      |                                                                                          |       |       | SSEADIDKALDAHAAPAWGK                 | 2195.08481 | 5.44             | 4.46  |
|           |      |                                                                                          |       |       | YFENPTPTGQVFCVAVR                    | 2114.00420 | 1.40             | 4.06  |
|           |      |                                                                                          |       |       | LIMQYASQNLIPVTLLEGK                  | 2188.20952 | 2.20             | 4.02  |
|           |      |                                                                                          |       |       | ALDAHAHAAPAWGK                       | 1349.69780 | 1.23             | 3.88  |
|           |      |                                                                                          |       |       | ILSYIEIGKSEGAK                       | 1507.84258 | 3.90             | 3.36  |
|           |      |                                                                                          |       |       | YDNYIGGEWVAPVEGR                     | 1824.86479 | 5.25             | 3.13  |
|           |      |                                                                                          |       |       | ETLNADIPLAIDHR                       | 1724.89775 | 0.62             | 2.72  |
|           |      |                                                                                          |       |       | IAFTGETTTGR                          | 1153.58586 | 0.89             | 2.66  |
|           |      |                                                                                          |       |       | YFAGVLR                              | 825.46514  | 4.06             | 1.59  |
| 118470741 | 3300 | oxidoreductase, Gfo/Iah/Moca family<br>protein [Mycobacterium smegmatis str.<br>MC2 155] | 49.40 | 47.09 | Sequence                             | MH+ [Da]   | $\Delta$ M [ppm] | XCorr |
|           |      |                                                                                          |       |       | AFANDQLLGTAAAPTFFGDVALHR             | 2450.26773 | 4.12             | 6.03  |
|           |      |                                                                                          |       |       | MTPIGVGVIKASPNGWAAALAHVPLLR          | 2612.42099 | 3.01             | 4.43  |
|           |      |                                                                                          |       |       | VLSTNIVGSGMAWAPGAPAAQAVAFDAR         | 2792.38994 | 2.62             | 4.37  |
|           |      |                                                                                          |       |       | VPDHYGLITDALTAGK                     | 1670.88224 | 4.40             | 3.69  |
|           |      |                                                                                          |       |       | AVFSEWPLGVALEQAQILHAEAVVAVGPTVWGLQAR | 3726.04209 | 1.11             | 3.26  |
|           |      |                                                                                          |       |       | VAWGVDAVYHDPFR                       | 1385.66216 | 1.75             | 2.42  |
|           |      |                                                                                          |       |       | MRELVDAGVYVK                         | 1337.69109 | 2.11             | 1.74  |
|           |      |                                                                                          |       |       | LIAGIEHVNITESHK                      | 1575.82436 | 0.33             | 1.62  |
|           |      |                                                                                          |       |       | VAWGVDAVYHDPFR                       | 1541.76445 | 2.34             | 1.48  |
| 118472727 | 4029 | hypothetical protein MSMEG_4029<br>[Mycobacterium smegmatis str. MC2 155]                | 49.09 | 54.73 | Sequence                             | MH+ [Da]   | $\Delta$ M [ppm] | XCorr |
|           |      |                                                                                          |       |       | VDEPAPLALANTLWIDR                    | 1894.00760 | 0.32             | 5.35  |
|           |      |                                                                                          |       |       | DLVASPPDVAVTAVSLINAASAETWPELR        | 3162.67119 | 0.92             | 4.85  |

|           |      |                                                                                    |       |       |                                                                                                                                                                                                   |                                                                                                                            |                                                                      |                                                                      |
|-----------|------|------------------------------------------------------------------------------------|-------|-------|---------------------------------------------------------------------------------------------------------------------------------------------------------------------------------------------------|----------------------------------------------------------------------------------------------------------------------------|----------------------------------------------------------------------|----------------------------------------------------------------------|
| 118469328 | 4124 | hypothetical protein MSMEG_4124<br>[Mycobacterium smegmatis str. MC2 155]          | 44.71 | 30.63 | ACEAPACAVFEIK<br>HGVDALADKDYVQAWIR<br>LDVRPARGSTDGLR<br>QAIEIATSPR<br>RLDVRPARGSTDGLRLEAVGR<br>RLDVRPARGSTDGLR                                                                                    | 1547.70366<br>2094.05947<br>1453.77683<br>1085.59697<br>2235.23940<br>1609.87749                                           | 0.94<br>3.74<br>0.67<br>1.81<br>3.41<br>0.32                         | 4.15<br>3.16<br>2.65<br>2.21<br>1.52<br>1.53                         |
| 118469921 | 6759 | glycerol kinase [Mycobacterium smegmatis<br>str. MC2 155]                          | 43.73 | 31.09 | LHLHPFVQYGNQSNQNSAGSISDVR<br>LQPALAVQSGVSATLAAAAGLR<br>VAAHPGLAVIPVAVALITEDTWNDSRPSSEDRFLR<br>VAAHPGLAVIPVAVALITEDTWNDSRPSSEDR<br>AVVAGYECAGILDQQLPNVSNR<br>CFHPGVSILPR<br>SIAVAAFR               | 2725.35642<br>2065.17827<br>3602.88540<br>3186.62143<br>2430.24863<br>1169.58989<br>834.48668                              | 4.49<br>0.84<br>3.83<br>1.08<br>1.62<br>1.21<br>4.10                 | 5.87<br>5.30<br>4.59<br>3.45<br>2.99<br>2.31<br>2.20                 |
| 118469637 | 5119 | 1-pyrrroline-5-carboxylate dehydrogenase<br>[Mycobacterium smegmatis str. MC2 155] | 42.57 | 30.07 | NITYGTGNFLLNTGTPVR<br>DQMHVIDSAAESESLAR<br>TGRPYNNAIWQDTR<br>LVDDNGGVYFVPAFSGLFAPYWR<br>LGDDAPVYVALEGSIAVTGSAVQWLRL<br>LQPSDLAALGVTNQRL<br>IQWILENVPGVRL<br>AGLPPATYFAGGK<br>TDSIAAALDRDRDGRGDVIR | 2039.06084<br>1858.86955<br>1839.92217<br>2590.28349<br>2588.33841<br>1582.86174<br>1423.80669<br>1249.66301<br>1900.99308 | 2.52<br>5.11<br>4.60<br>2.65<br>1.08<br>4.37<br>0.71<br>4.32<br>4.96 | 5.34<br>4.96<br>3.82<br>3.72<br>3.56<br>2.52<br>2.42<br>1.59<br>1.64 |
|           |      | Sequence                                                                           |       |       |                                                                                                                                                                                                   | MH+ [Da]                                                                                                                   | $\Delta$ M [ppm]                                                     | XCorr                                                                |
|           |      | LAGIHFTGSTATFQHLWR                                                                 |       |       |                                                                                                                                                                                                   | 2043.05674                                                                                                                 | 0.37                                                                 | 5.36                                                                 |
|           |      | LVGETGKDFVLAHSSAHPDVLR                                                             |       |       |                                                                                                                                                                                                   | 2405.26810                                                                                                                 | 4.49                                                                 | 5.01                                                                 |
|           |      | YGLTGAVIADDRITAVQQAALDGLR                                                          |       |       |                                                                                                                                                                                                   | 2403.26694                                                                                                                 | 1.73                                                                 | 4.23                                                                 |
|           |      | SAYQAEIDAPCELIDFWR                                                                 |       |       |                                                                                                                                                                                                   | 2184.00981                                                                                                                 | 1.41                                                                 | 3.41                                                                 |
|           |      | QILAQQPISSPGVWNR                                                                   |       |       |                                                                                                                                                                                                   | 1793.97417                                                                                                                 | 4.68                                                                 | 2.98                                                                 |

|           |      |                                                                           |       |       |                                  |            |                  |       |
|-----------|------|---------------------------------------------------------------------------|-------|-------|----------------------------------|------------|------------------|-------|
| 118471263 | 6489 | hypothetical protein MSMEG_6489<br>[Mycobacterium smegmatis str. MC2 155] | 41.74 | 47.73 | MGDDFLSATEALR                    | 1425.66985 | 1.34             | 2.63  |
|           |      |                                                                           |       |       | AADLLSGPWR                       | 1085.57842 | 4.18             | 2.28  |
|           |      |                                                                           |       |       | QDWALPFDQR                       | 1346.65093 | 1.55             | 2.21  |
|           |      |                                                                           |       |       | IIDVDTGAK                        | 1030.57842 | 0.44             | 2.05  |
|           |      |                                                                           |       |       | EVGANIDRYHTYPR                   | 1690.83159 | 1.15             | 2.57  |
|           |      |                                                                           |       |       | FNVAIFAR                         | 824.44481  | 4.15             | 1.86  |
|           |      |                                                                           |       |       | Sequence                         | MH+ [Da]   | $\Delta$ M [ppm] | XCorr |
|           |      |                                                                           |       |       | TAAADLVFADGITSAR                 | 1748.92095 | 1.78             | 4.23  |
|           |      |                                                                           |       |       | AAADAWTLAGALAAASDGIAAALR         | 2242.15044 | 1.81             | 3.87  |
|           |      |                                                                           |       |       | GFGGSVHPGQVQDR                   | 1626.80022 | 1.14             | 3.27  |
|           |      |                                                                           |       |       | AWVGGSIGLTTALLR                  | 1697.03349 | 0.83             | 3.15  |
|           |      |                                                                           |       |       | KMEPAQLQLSDSLR                   | 1783.97295 | 1.55             | 3.12  |
|           |      |                                                                           |       |       | SSQDLGDLQTATR                    | 1391.67949 | 2.39             | 3.02  |
|           |      |                                                                           |       |       | GTVALSALSEPTR                    | 1301.71013 | 3.16             | 2.98  |
|           |      |                                                                           |       |       | ADAAELEFAPAVAEIVVR               | 1729.91472 | 1.55             | 2.49  |
|           |      |                                                                           |       |       | NVPAGPELTEMIDKR                  | 1782.94402 | 1.16             | 2.44  |
|           |      |                                                                           |       |       | ERFDPDATLR                       | 1219.60649 | -0.12            | 2.41  |
|           |      |                                                                           |       |       | LMNYVWYR                         | 1144.56597 | 4.48             | 2.27  |
|           |      |                                                                           |       |       | VALIGDAACASRPHAAAGTAK            | 2008.03928 | -0.05            | 2.01  |
|           |      |                                                                           |       |       | Sequence                         | MH+ [Da]   | $\Delta$ M [ppm] | XCorr |
| 118468818 | 5249 | serine hydroxymethyltransferase<br>[Mycobacterium smegmatis str. MC2 155] | 40.27 | 35.51 | EIADEVGATLMVDMAHFAGLVAGK         | 2445.21538 | -0.01            | 5.31  |
|           |      |                                                                           |       |       | SYGTNPETGFLDYDAVAAAAR            | 2189.01860 | 1.81             | 4.58  |
|           |      |                                                                           |       |       | QAESALLDAGIVTNR                  | 1557.82988 | 4.29             | 3.95  |
|           |      |                                                                           |       |       | QPAFQQYAQQVADNAQALADGFVKR        | 2764.38297 | 0.98             | 3.67  |
|           |      |                                                                           |       |       | LIASENYASPAVLLTMGTWFSDKYAEGTTGHR | 3498.75014 | 3.94             | 3.57  |
|           |      |                                                                           |       |       | EFKPLVIVAGYSAYPR                 | 1809.99455 | 2.60             | 3.37  |
|           |      |                                                                           |       |       | VHAASSELLSANPLYPGLTL             | 2053.09819 | 0.82             | 2.78  |
|           |      |                                                                           |       |       | VFTGDEDPVPHAHVTTTTTHK            | 2290.11216 | 0.97             | 2.38  |
|           |      |                                                                           |       |       | Sequence                         | MH+ [Da]   | $\Delta$ M [ppm] | XCorr |
| 302595980 | 5435 | RecName: Full=Putative ligase<br>MSMEG_5435                               | 36.78 | 23.12 | LASLGPLINDLEAR                   | 1481.83269 | 0.26             | 4.17  |



|           |      |                                                                                                                 |       |       |                         |            |                  |       |
|-----------|------|-----------------------------------------------------------------------------------------------------------------|-------|-------|-------------------------|------------|------------------|-------|
| 302595893 | 1801 | ReclName: Full=Adenosylhomocysteinase;<br>AltName: Full=S-adenosyl-L-homocysteine<br>hydrolase; Short=AdoHcyase | 29.57 | 18.56 | THLDTVLLK               | 1039.61626 | 1.54             | 2.05  |
|           |      |                                                                                                                 |       |       | LIDMAAFR                | 919.49968  | 0.04             | 1.65  |
|           |      |                                                                                                                 |       |       | Sequence                | MH+ [Da]   | $\Delta$ M [ppm] | XCorr |
|           |      |                                                                                                                 |       |       | VSVTEIDPINALQALMDGFDVR  | 2403.22807 | 2.29             | 5.43  |
|           |      |                                                                                                                 |       |       | AGVPPAEDDDPAEWK         | 1695.79436 | 4.83             | 3.48  |
|           |      |                                                                                                                 |       |       | LAHEMPGLMALR            | 1467.75006 | 3.61             | 3.23  |
|           |      |                                                                                                                 |       |       | IHVEALGGLTK             | 1238.71391 | 2.86             | 2.83  |
|           |      |                                                                                                                 |       |       | VADLSLADFGR             | 1163.60661 | 0.89             | 2.45  |
|           |      |                                                                                                                 |       |       | SITVSEGR                | 973.57176  | 4.15             | 2.11  |
|           |      |                                                                                                                 |       |       | VFLGVLR                 | 803.51641  | 3.20             | 1.74  |
| 118468558 | 4497 | PhoH family protein [Mycobacterium<br>smegmatis str. MC2 155]                                                   | 29.26 | 50.00 | Sequence                | MH+ [Da]   | $\Delta$ M [ppm] | XCorr |
|           |      |                                                                                                                 |       |       | LMSAGVIEVAPLAVYR        | 1720.91582 | 1.89             | 4.24  |
|           |      |                                                                                                                 |       |       | TLNDAFTILDEAQNITTAEQMK  | 2366.15776 | 1.37             | 3.90  |
|           |      |                                                                                                                 |       |       | IVVTGDVTVQVDLPGATSGLR   | 2055.11846 | 5.00             | 3.88  |
|           |      |                                                                                                                 |       |       | HSVAILTGAGDESPAELTLDLSR | 2564.35874 | 0.77             | 2.88  |
|           |      |                                                                                                                 |       |       | IILTRPAVEAGER           | 1424.82207 | 0.00             | 2.69  |
|           |      |                                                                                                                 |       |       | HYVDAIDAHTIVFGIPAGTGK   | 2239.14548 | -2.33            | 2.59  |
|           |      |                                                                                                                 |       |       | IDPYLRPLVDALHDMMDTELPK  | 2759.38218 | 1.36             | 2.55  |
|           |      |                                                                                                                 |       |       | SSITVPPDIIVGLGSADENLR   | 2266.23198 | 1.31             | 1.87  |
|           |      |                                                                                                                 |       |       | LGFLPGLTSEK             | 1161.65764 | 5.32             | 1.51  |
| 118468959 | 6422 | ferritin family protein [Mycobacterium<br>smegmatis str. MC2 155]                                               | 27.76 | 44.75 | Sequence                | MH+ [Da]   | $\Delta$ M [ppm] | XCorr |
|           |      |                                                                                                                 |       |       | LASVARDEGDHIGEQFMQWFLK  | 2577.25650 | 0.35             | 5.05  |
|           |      |                                                                                                                 |       |       | DALALALDQER             | 1214.64311 | 4.53             | 3.66  |
|           |      |                                                                                                                 |       |       | AGSNLFHIEDFVAR          | 1575.79302 | 0.97             | 3.30  |
|           |      |                                                                                                                 |       |       | HFEYAQALEER             | 1263.61211 | 0.32             | 2.53  |
|           |      |                                                                                                                 |       |       | EQVEEVAAMTTLVR          | 1575.81377 | 5.71             | 2.41  |
|           |      |                                                                                                                 |       |       | FHALIQDQIR              | 1240.68437 | 3.74             | 2.26  |
| 118470644 | 6904 | myo-inositol-1-phosphate synthase<br>[Mycobacterium smegmatis str. MC2 155]                                     | 26.00 | 25.90 | Sequence                | MH+ [Da]   | $\Delta$ M [ppm] | XCorr |
|           |      |                                                                                                                 |       |       | VAVIVGNCASSLVQGVQYVR    | 2240.15264 | 1.49             | 4.39  |

|           |      |                                                                                                 |       |       |                             |            |       |      |
|-----------|------|-------------------------------------------------------------------------------------------------|-------|-------|-----------------------------|------------|-------|------|
| 118472266 | 0255 | phosphoenolpyruvate carboxykinase<br>[Mycobacterium smegmatis str. MC2 155]                     | 25.79 | 19.24 | KEEDAGVPIVGDNIK             | 1602.84429 | 4.26  | 4.27 |
|           |      |                                                                                                 |       |       | NADENTTVPGLMHYK             | 1625.80144 | 3.80  | 3.80 |
|           |      |                                                                                                 |       |       | GIGGPIEAASAYLWK             | 1477.77287 | 0.58  | 3.00 |
|           |      |                                                                                                 |       |       | TQAVTSNLSGALAGK             | 1417.77056 | 4.20  | 2.70 |
|           |      |                                                                                                 |       |       | IADVPTDVIYQR                | 1422.80181 | 4.66  | 1.74 |
|           |      |                                                                                                 |       |       | IASAMAHDEGWLAEHMLLK         | 2236.12735 | 0.86  | 4.70 |
|           |      |                                                                                                 |       |       | TIAAGNTVFTNVAK              | 1406.77043 | 4.66  | 3.76 |
|           |      |                                                                                                 |       |       | LCAHLVEAGTFQK               | 1473.75566 | 2.54  | 3.37 |
|           |      |                                                                                                 |       |       | TNLAMLQPTIEGWR              | 1629.84575 | 2.41  | 3.00 |
|           |      |                                                                                                 |       |       | ALHSIGAPLEPGQK              | 1417.78386 | 2.82  | 2.59 |
|           |      |                                                                                                 |       |       | VFFVNWFR                    | 1114.58245 | -0.78 | 2.57 |
|           |      |                                                                                                 |       |       | AALDKLGDDGFFVK              | 1495.78415 | 3.30  | 1.91 |
|           |      |                                                                                                 |       |       | YITHEPETR                   | 1163.58769 | 2.82  | 1.79 |
|           |      |                                                                                                 |       |       | FLWPGFGENSR                 | 1309.63347 | 0.77  | 1.88 |
| 118468100 | 2748 | soluble pyridine nucleotide<br>transhydrogenase [Mycobacterium<br>smegmatis str. MC2 155]       | 25.48 | 22.93 |                             |            |       |      |
|           |      |                                                                                                 |       |       | DNMLEFCDEIVEALK             | 1922.88762 | 0.04  | 4.61 |
|           |      |                                                                                                 |       |       | LAAYHAFGEPAK                | 1274.65581 | 2.32  | 3.07 |
|           |      |                                                                                                 |       |       | QGQTEHLDLANAGLVDGR          | 1950.97173 | 4.53  | 2.58 |
|           |      |                                                                                                 |       |       | QIPADTVMYSAGR               | 1408.69451 | 3.91  | 2.57 |
|           |      |                                                                                                 |       |       | EAVVYLTGMNQR                | 1380.70146 | 5.35  | 2.24 |
|           |      |                                                                                                 |       |       | GQMLGGVAVNTGTIPSK           | 1718.86540 | 5.18  | 2.16 |
|           |      |                                                                                                 |       |       | ITVDSNFQTK                  | 1152.59258 | 2.61  | 1.91 |
|           |      |                                                                                                 |       |       | LLVSTEDLR                   | 1045.59368 | 4.61  | 1.81 |
| 118470278 | 4932 | UDP-N-acetylglucosamine 1-<br>carboxyvinyltransferase [Mycobacterium<br>smegmatis str. MC2 155] | 25.43 | 26.79 |                             |            |       |      |
|           |      |                                                                                                 |       |       | AGAGLVLAGLVADGETEVHVDVFIHDR | 2661.36728 | 1.51  | 4.32 |
|           |      |                                                                                                 |       |       | GYPLFVENLVSLGAIEIR          | 2006.07256 | 6.55  | 4.19 |
|           |      |                                                                                                 |       |       | LHDAGATVTVQNDNGFR           | 1715.81046 | 0.46  | 3.57 |
|           |      |                                                                                                 |       |       | ITSPDEPKVDADFAAVR           | 1894.92522 | 3.69  | 3.08 |



|                         |            |                                                                                                                      |       |       |                                          |                          |                  |              |
|-------------------------|------------|----------------------------------------------------------------------------------------------------------------------|-------|-------|------------------------------------------|--------------------------|------------------|--------------|
| 118470200               | 3102       | transaldolase [Mycobacterium smegmatis str. MC2 155]                                                                 | 23.89 | 23.72 | GIPQLSSAPVWSSDIR<br>GDITVTGVDPPQHLQLVLHK | 1712.89849<br>2070.14371 | 1.05<br>4.55     | 2.59<br>1.68 |
| 118468007               | 3055       | S-adenosylmethionine synthetase [Mycobacterium smegmatis str. MC2 155]                                               | 23.56 | 23.56 | Sequence                                 | MH+ [Da]                 | $\Delta$ M [ppm] | XCorr        |
|                         |            |                                                                                                                      |       |       | GTAYDAQVNELAAR                           | 1478.72771               | 2.87             | 4.58         |
|                         |            |                                                                                                                      |       |       | LAAGIDLPDVFR                             | 1399.79534               | 0.62             | 3.49         |
|                         |            |                                                                                                                      |       |       | VQRPLWASTGVK                             | 1341.76641               | 1.93             | 2.91         |
|                         |            |                                                                                                                      |       |       | VLEDEGVEKEEK                             | 1421.71697               | 0.73             | 2.71         |
|                         |            |                                                                                                                      |       |       | VSEVDPR                                  | 914.49492                | 0.76             | 2.09         |
|                         |            |                                                                                                                      |       |       | SWQELLDATQQLDAKK                         | 2002.03031               | 3.10             | 1.84         |
|                         |            |                                                                                                                      |       |       | IHSVASFFVSR                              | 1249.67632               | 5.99             | 2.15         |
|                         |            |                                                                                                                      |       |       | Sequence                                 | MH+ [Da]                 | $\Delta$ M [ppm] | XCorr        |
|                         |            |                                                                                                                      |       |       | DLDLRLRYAPTAAYGHFGR                      | 2246.17362               | 0.83             | 4.97         |
| AAPVGLFVETFGSETVDPAKIEK | 2405.26738 | 3.07                                                                                                                 | 4.29  |       |                                          |                          |                  |              |
| FVLGGPMGDAGLTGR         | 1447.74407 | 5.36                                                                                                                 | 3.33  |       |                                          |                          |                  |              |
| NVVAAGLAER              | 999.55901  | 0.78                                                                                                                 | 2.88  |       |                                          |                          |                  |              |
| AIGEVFDLRPAANVR         | 1626.93437 | 1.03                                                                                                                 | 2.75  |       |                                          |                          |                  |              |
| IIVDTYGGWAR             | 1250.65752 | 3.73                                                                                                                 | 2.50  |       |                                          |                          |                  |              |
| 302425159               | 3890       | RecName: Full=Pup--protein ligase; AltName: Full=Proteasome accessory factor A; AltName: Full=Pup-conjugating enzyme | 22.49 | 18.58 | Sequence                                 | MH+ [Da]                 | $\Delta$ M [ppm] | XCorr        |
|                         |            |                                                                                                                      |       |       | ISQDLVAYHDIKR                            | 1571.86040               | 4.03             | 3.71         |
|                         |            |                                                                                                                      |       |       | VGTASLVLEMIEAGVPRFDPSLDNPIR              | 2946.54068               | 0.39             | 3.42         |
|                         |            |                                                                                                                      |       |       | ISDVLLPFLVTR                             | 1372.81975               | -0.13            | 2.91         |
|                         |            |                                                                                                                      |       |       | GVFDLLQR                                 | 947.53325                | 2.44             | 2.03         |
|                         |            |                                                                                                                      |       |       | EPNTQIEQVVDLWGR                          | 1783.90080               | 1.90             | 1.93         |
|                         |            |                                                                                                                      |       |       | TVLCKDPPR                                | 1135.59473               | 1.62             | 1.60         |
|                         |            |                                                                                                                      |       |       | Sequence                                 | MH+ [Da]                 | $\Delta$ M [ppm] | XCorr        |
|                         |            |                                                                                                                      |       |       | AFVNRPLVLIADPETGNIDPETSKDINDLLER         | 3581.85422               | 0.57             | 5.67         |
|                         |            |                                                                                                                      |       |       | LLLGADTPTSGDVR                           | 1414.75908               | 3.80             | 3.03         |
| ANRLPSELSGGEEQQR        | 1641.82999 | -0.25                                                                                                                | 2.89  |       |                                          |                          |                  |              |
| QVITGVFQDFR             | 1368.67473 | 1.30                                                                                                                 | 2.56  |       |                                          |                          |                  |              |
| 118473811               | 2089       | cell division ATP-binding protein FtsE [Mycobacterium smegmatis str. MC2 155]                                        | 21.71 | 43.23 | Sequence                                 | MH+ [Da]                 | $\Delta$ M [ppm] | XCorr        |
|                         |            |                                                                                                                      |       |       | AFVNRPLVLIADPETGNIDPETSKDINDLLER         | 3581.85422               | 0.57             | 5.67         |
|                         |            |                                                                                                                      |       |       | LLLGADTPTSGDVR                           | 1414.75908               | 3.80             | 3.03         |
|                         |            |                                                                                                                      |       |       | ANRLPSELSGGEEQQR                         | 1641.82999               | -0.25            | 2.89         |
|                         |            |                                                                                                                      |       |       | QVITGVFQDFR                              | 1368.67473               | 1.30             | 2.56         |

|           |      |                                                                                                                                     |       |       |                                                                                                                                                |                                                                                              |                                                                     |                                                       |
|-----------|------|-------------------------------------------------------------------------------------------------------------------------------------|-------|-------|------------------------------------------------------------------------------------------------------------------------------------------------|----------------------------------------------------------------------------------------------|---------------------------------------------------------------------|-------------------------------------------------------|
| 118468392 | 5933 | hypothetical protein MSMEG_5933<br>[Mycobacterium smegmatis str. MC2 155]                                                           | 21.69 | 29.80 | VWELEGR<br>TGTTWMAATHDHHIVDSMR                                                                                                                 | 914.53386                                                                                    | 3.55                                                                | 2.35                                                  |
| 118473843 | 1678 | LysR family transcriptional regulator<br>[Mycobacterium smegmatis str. MC2 155]                                                     | 21.57 | 35.69 | Sequence<br>GLALTAAGEEMLHDTR<br>GTYDGGEVSVPIRDELPGLPYLAR<br>AADELHIAQSASAAISQLEQIGTQLFIR<br>RRPDVTLAQLR<br>GHGFSILNQIPAHR<br>LACFVLTLPFVLPFR   | MH+ [Da]<br>1684.84050<br>2722.48386<br>3208.69829<br>1324.78122<br>1546.82993<br>1633.91753 | $\Delta$ M<br>[ppm]<br>4.81<br>2.32<br>0.65<br>0.27<br>3.97<br>2.45 | XCorr<br>4.26<br>4.18<br>3.96<br>2.67<br>2.44<br>1.93 |
| 118472062 | 1443 | 50S ribosomal protein L16 [Mycobacterium<br>smegmatis str. MC2 155]                                                                 | 20.81 | 47.10 | Sequence<br>VWINIFPDRPLTK<br>GIASGGTSVDFGDIQALEHAYTTNR<br>GSPWWVAVNVKPRG<br>VLFELSPDEK                                                         | MH+ [Da]<br>1598.90593<br>2784.36380<br>1582.81975<br>1339.67900                             | $\Delta$ M<br>[ppm]<br>0.33<br>1.78<br>4.54<br>0.70                 | XCorr<br>3.86<br>3.69<br>3.56<br>3.51                 |
| 118473275 | 3054 | bifunctional phosphopantothenoylcysteine<br>decarboxylase/phosphopantothenate<br>synthase [Mycobacterium smegmatis str.<br>MC2 155] | 20.16 | 28.02 | Sequence<br>LTGADSGRGLPEAEITTLAQLLER<br>IGQQADLVVAPATADLLAR<br>ADDLTATLLTAR<br>IVDSIAAFK<br>FVGAATFEALSGNPVHTGVFTDVHEVQHVR<br>ALVTAGTRREPLDPVR | MH+ [Da]<br>2850.52494<br>2035.15776<br>1373.76604<br>1076.63616<br>3221.61977<br>1651.91631 | $\Delta$ M<br>[ppm]<br>1.42<br>1.49<br>1.82<br>1.00<br>2.16<br>2.19 | XCorr<br>4.08<br>3.08<br>2.46<br>2.23<br>1.52<br>2.40 |

|           |      |                                                                        |       |       |                                                                                                                                                                   |          |            |                  |       |
|-----------|------|------------------------------------------------------------------------|-------|-------|-------------------------------------------------------------------------------------------------------------------------------------------------------------------|----------|------------|------------------|-------|
| 118470801 | 3902 | ATPase AAA [Mycobacterium smegmatis str. MC2 155]                      | 20.13 | 8.97  | ASEGTPVIVFFDEMDSIFR<br>EQLENNAVGPQSGLR<br>IWMIAEPLVAAK<br>LTCSPNIEVK                                                                                              | Sequence | MH+ [Da]   | $\Delta$ M [ppm] | XCorr |
|           |      |                                                                        |       |       |                                                                                                                                                                   |          | 2160.03398 | 0.96             | 4.31  |
|           |      |                                                                        |       |       |                                                                                                                                                                   |          | 1497.76738 | 1.14             | 3.12  |
|           |      |                                                                        |       |       |                                                                                                                                                                   |          | 1309.78826 | 0.26             | 2.60  |
|           |      |                                                                        |       |       |                                                                                                                                                                   |          | 1160.59868 | 0.56             | 1.77  |
| 118469413 | 3953 | hypothetical protein MSMEG_3953 [Mycobacterium smegmatis str. MC2 155] | 19.90 | 20.90 | FHGGITQYLEPTMSSDVHAHAIGAR<br>ELASLTLDAGAALLER<br>VPAGSGITLAGFTTADYSR<br>AATNTPVLLR                                                                                | Sequence | MH+ [Da]   | $\Delta$ M [ppm] | XCorr |
|           |      |                                                                        |       |       |                                                                                                                                                                   |          | 2558.24997 | 1.65             | 5.78  |
|           |      |                                                                        |       |       |                                                                                                                                                                   |          | 1813.00908 | 1.33             | 4.23  |
|           |      |                                                                        |       |       |                                                                                                                                                                   |          | 2054.05864 | 1.58             | 3.67  |
|           |      |                                                                        |       |       |                                                                                                                                                                   |          | 1168.70952 | 3.96             | 2.49  |
| 118469767 | 6427 | [Mn] superoxide dismutase [Mycobacterium smegmatis str. MC2 155]       | 19.86 | 19.32 | AFWNVVNWDDVQNR<br>ANGDHAATFLEK<br>GVNDALAKLEEAR                                                                                                                   | Sequence | MH+ [Da]   | $\Delta$ M [ppm] | XCorr |
|           |      |                                                                        |       |       |                                                                                                                                                                   |          | 1762.83245 | 1.57             | 4.35  |
|           |      |                                                                        |       |       |                                                                                                                                                                   |          | 1399.69817 | 1.18             | 2.88  |
|           |      |                                                                        |       |       |                                                                                                                                                                   |          | 1385.74463 | 4.50             | 2.74  |
| 118470831 | 6271 | 2-isopropylmalate synthase [Mycobacterium smegmatis str. MC2 155]      | 18.20 | 16.45 | TITPPSGAPHPGQPANWNTQR<br>TGNVCLVTLGLNMFNR<br>RMFDLLVR<br>QKVDAAEEDGGTDKITAVVK<br>EMWDAFSEELYAPITPLER<br>GVDPQIDFSNIDEIRR                                          | Sequence | MH+ [Da]   | $\Delta$ M [ppm] | XCorr |
|           |      |                                                                        |       |       |                                                                                                                                                                   |          | 2113.06474 | 3.45             | 4.43  |
|           |      |                                                                        |       |       |                                                                                                                                                                   |          | 1781.90691 | 1.76             | 3.54  |
|           |      |                                                                        |       |       |                                                                                                                                                                   |          | 1049.59636 | 3.67             | 2.53  |
|           |      |                                                                        |       |       |                                                                                                                                                                   |          | 2074.07096 | 2.21             | 2.22  |
|           |      |                                                                        |       |       |                                                                                                                                                                   |          | 2297.08501 | 2.37             | 2.06  |
|           |      |                                                                        |       |       |                                                                                                                                                                   |          | 1873.94620 | 3.12             | 1.54  |
| 118472070 | 1662 | hypothetical protein MSMEG_1662 [Mycobacterium smegmatis str. MC2 155] | 17.08 | 29.72 | LSFFPLWSYATPPAIEIAER<br>GFLTPALWEAGLYCR<br>GLTSGYSPLGAMWASDR<br>HGDDGITPPIITR<br>ADDRGDPVWQLAPPLISGQAEFDAYDILHNVLTEAGNRL<br>APFEPLTPGGFR<br>SIAVHGTPQGALAITGIPAFK | Sequence | MH+ [Da]   | $\Delta$ M [ppm] | XCorr |
|           |      |                                                                        |       |       |                                                                                                                                                                   |          | 2308.22051 | 8.31             | 4.51  |
|           |      |                                                                        |       |       |                                                                                                                                                                   |          | 1753.87493 | 1.03             | 4.12  |
|           |      |                                                                        |       |       |                                                                                                                                                                   |          | 1681.82231 | 0.49             | 3.55  |
|           |      |                                                                        |       |       |                                                                                                                                                                   |          | 1276.70391 | 2.38             | 2.90  |
|           |      |                                                                        |       |       |                                                                                                                                                                   |          | 4303.20327 | 0.86             | 1.75  |
|           |      |                                                                        |       |       |                                                                                                                                                                   |          | 1288.67412 | 4.34             | 2.01  |
|           |      |                                                                        |       |       |                                                                                                                                                                   |          | 2113.14731 | 1.50             | 1.12  |

|           |      |                                                                                    |       |       |                         |          |            |                  |       |       |      |
|-----------|------|------------------------------------------------------------------------------------|-------|-------|-------------------------|----------|------------|------------------|-------|-------|------|
| 118468233 | 3132 | DNA-binding protein [Mycobacterium smegmatis str. MC2 155]                         | 14.89 | 23.22 | GLLLVNHPEVGPLDLHFQHLSLR | MH+ [Da] | 2604.44565 | $\Delta$ M [ppm] | 1.78  | XCorr | 5.27 |
|           |      |                                                                                    |       |       | LSPSFAHGNGPLR           |          | 1352.70964 |                  | 1.94  |       | 2.70 |
|           |      |                                                                                    |       |       | ERPSDQVLDALAR           |          | 1469.77788 |                  | 4.84  |       | 2.47 |
|           |      |                                                                                    |       |       | ALLLSPDATVYMR           |          | 1449.77837 |                  | 0.89  |       | 1.83 |
| 118468644 | 0906 | DNA-binding protein [Mycobacterium smegmatis str. MC2 155]                         | 14.03 | 12.76 | MAAELAVLEFGDLIDKLVDDEGR | MH+ [Da] | 2468.24082 | $\Delta$ M [ppm] | 1.19  | XCorr | 6.48 |
|           |      |                                                                                    |       |       | RIDMGETVLHR             |          | 1326.69477 |                  | 0.01  |       | 3.15 |
|           |      |                                                                                    |       |       | LGLANVFAAATLPPVR        |          | 1739.95036 |                  | 1.37  |       | 2.45 |
|           |      |                                                                                    |       |       | ILVQIAQMPDGR            |          | 1340.74138 |                  | 4.34  |       | 1.95 |
| 118472028 | 6423 | glycerophosphoryl diester phosphodiesterase [Mycobacterium smegmatis str. MC2 155] | 13.95 | 26.69 | TSTGTGLVSEMTLAEIIR      | MH+ [Da] | 1765.90605 | $\Delta$ M [ppm] | 3.35  | XCorr | 3.59 |
|           |      |                                                                                    |       |       | KLNFGSWHPNSWR           |          | 1514.77137 |                  | 4.07  |       | 3.21 |
|           |      |                                                                                    |       |       | AAPMLPTVLLGETSR         |          | 1555.85295 |                  | 1.04  |       | 2.75 |
|           |      |                                                                                    |       |       | LLALLHR                 |          | 835.55486  |                  | 4.29  |       | 2.09 |
|           |      |                                                                                    |       |       | DVGVAWIATINHPGR         |          | 1492.77188 |                  | 4.20  |       | 1.78 |
|           |      |                                                                                    |       |       | MALDWNRPVK              |          | 1229.65129 |                  | 4.30  |       | 2.31 |
| 118473840 | 3906 | tRNA (adenine-N(1)-)-methyltransferase [Mycobacterium smegmatis str. MC2 155]      | 13.68 | 39.36 | STNGDQFLVLRPLLVDVYMSMPR | MH+ [Da] | 2651.37082 | $\Delta$ M [ppm] | 0.87  | XCorr | 4.11 |
|           |      |                                                                                    |       |       | DAAQIVHEGDIFPGAR        |          | 1695.85295 |                  | 4.69  |       | 3.67 |
|           |      |                                                                                    |       |       | VLEAGAGSSGALTCILLR      |          | 1674.89336 |                  | 5.33  |       | 3.43 |
|           |      |                                                                                    |       |       | GIIAFDVITGLPEGSVVK      |          | 1829.00725 |                  | 0.90  |       | 2.46 |
|           |      |                                                                                    |       |       | KIAPGAVAPMPILRR         |          | 1476.88300 |                  | -0.17 |       | 1.61 |
|           |      |                                                                                    |       |       | AVGPEGSVTSYEVRDDHAVAHER |          | 2481.17983 |                  | 1.78  |       | 1.07 |
| 118467605 | 6059 | hypothetical protein MSMEG_6059 [Mycobacterium smegmatis str. MC2 155]             | 13.42 | 54.26 | EAAVATTALALR            | MH+ [Da] | 1186.68352 | $\Delta$ M [ppm] | 3.74  | XCorr | 3.35 |
|           |      |                                                                                    |       |       | LKVADVMAEAR             |          | 1202.66118 |                  | 4.10  |       | 3.34 |
|           |      |                                                                                    |       |       | IGEEVPPPAAGDAGHDH       |          | 1920.84830 |                  | 0.58  |       | 2.19 |
|           |      |                                                                                    |       |       | mVWHGLLVK               |          | 1098.61772 |                  | 4.38  |       | 1.16 |

|           |      |                                                                                                 |       |       |          |  |            |                     |       |
|-----------|------|-------------------------------------------------------------------------------------------------|-------|-------|----------|--|------------|---------------------|-------|
| 118473835 | 3265 | arabitol-phosphate dehydrogenase<br>[Mycobacterium smegmatis str. MC2 155]                      | 12.67 | 17.96 | MVWHGLVK |  | 1082.62287 | 4.50                | 2.27  |
|           |      | Sequence                                                                                        |       |       |          |  | MH+ [Da]   | $\Delta$ M<br>[ppm] | XCorr |
|           |      | VSPDIPAQHAAFAEPLSCSLHAVER                                                                       |       |       |          |  | 2702.34995 | 5.30                | 3.81  |
|           |      | TPGAMASYMVPAAEALVHK                                                                             |       |       |          |  | 2036.00296 | 2.40                | 3.57  |
|           |      | VIALDMAPDKLK                                                                                    |       |       |          |  | 1313.75542 | 4.26                | 3.27  |
|           |      | LEEVAVPQR                                                                                       |       |       |          |  | 1040.57378 | 0.23                | 2.01  |
| 118469514 | 1568 | glucosamine--fructose-6-phosphate<br>aminotransferase [Mycobacterium<br>smegmatis str. MC2 155] | 12.59 | 10.67 |          |  |            |                     |       |
|           |      | Sequence                                                                                        |       |       |          |  | MH+ [Da]   | $\Delta$ M<br>[ppm] | XCorr |
|           |      | TFLAQIAANYLVGLALAQAR                                                                            |       |       |          |  | 2104.19756 | 2.91                | 4.23  |
|           |      | VLAGMDSVAALAEER                                                                                 |       |       |          |  | 1402.74272 | 4.81                | 3.13  |
|           |      | HVGYPALEGALK                                                                                    |       |       |          |  | 1353.75859 | 4.45                | 2.65  |
|           |      | FAPSSVLEFLGR                                                                                    |       |       |          |  | 1294.71562 | 0.13                | 2.58  |
|           |      | YAIHWMTR                                                                                        |       |       |          |  | 1075.53293 | 0.88                | 1.80  |
| 118472788 | 5789 | thiosulfate sulfurtransferase<br>[Mycobacterium smegmatis str. MC2 155]                         | 12.35 | 17.69 |          |  |            |                     |       |
|           |      | Sequence                                                                                        |       |       |          |  | MH+ [Da]   | $\Delta$ M<br>[ppm] | XCorr |
|           |      | AANEDGTFKSDEELAK                                                                                |       |       |          |  | 1724.79875 | 0.76                | 3.51  |
|           |      | SSHTWFVLQELLGHK                                                                                 |       |       |          |  | 1781.93497 | 0.89                | 3.16  |
|           |      | VERPQTSYTAKEPDNSIR                                                                              |       |       |          |  | 2091.04629 | -0.15               | 2.91  |
| 118473775 | 5247 | PhoH family protein [Mycobacterium<br>smegmatis str. MC2 155]                                   | 12.00 | 6.64  |          |  |            |                     |       |
|           |      | Sequence                                                                                        |       |       |          |  | MH+ [Da]   | $\Delta$ M<br>[ppm] | XCorr |
|           |      | SPIAALVTEMLEEISPGALP                                                                            |       |       |          |  | 2038.07792 | 0.06                | 3.58  |
|           |      | NVLLTVLSR                                                                                       |       |       |          |  | 1014.63109 | 0.43                | 2.50  |
| 118473519 | 6266 | thiocyanate hydrolase subunit beta<br>[Mycobacterium smegmatis str. MC2 155]                    | 11.96 | 21.80 |          |  |            |                     |       |
|           |      | Sequence                                                                                        |       |       |          |  | MH+ [Da]   | $\Delta$ M<br>[ppm] | XCorr |
|           |      | FSVGEAVVVR                                                                                      |       |       |          |  | 1062.59819 | 3.68                | 2.87  |
|           |      | AVGIGDPQIYAGK                                                                                   |       |       |          |  | 1288.69548 | 4.53                | 2.72  |
|           |      | DLPALLYTR                                                                                       |       |       |          |  | 1061.59929 | 0.26                | 2.38  |
|           |      | AIYQGIPIYVGR                                                                                    |       |       |          |  | 1300.67412 | 4.34                | 2.08  |
|           |      | WLMWAVAR                                                                                        |       |       |          |  | 901.50530  | 1.07                | 1.91  |
|           |      | GIWLSEER                                                                                        |       |       |          |  | 989.50878  | 3.69                | 1.29  |
| 118472240 | 0220 | monoglyceride lipase [Mycobacterium<br>smegmatis str. MC2 155]                                  | 11.84 | 15.36 |          |  |            |                     |       |
|           |      | Sequence                                                                                        |       |       |          |  | MH+ [Da]   | $\Delta$ M<br>[ppm] | XCorr |
|           |      | FGAAGLLVALDHR                                                                                   |       |       |          |  | 1502.81183 | 0.23                | 4.07  |

|           |      |                                                                                         |       |       |                                                                                                                                    |                                                                                |                                                          |                                               |
|-----------|------|-----------------------------------------------------------------------------------------|-------|-------|------------------------------------------------------------------------------------------------------------------------------------|--------------------------------------------------------------------------------|----------------------------------------------------------|-----------------------------------------------|
| 118470580 | 5727 | allantoicase [Mycobacterium smegmatis str. MC2 155]                                     | 11.44 | 17.81 | TLVGIAAANDHPITLPR<br>LVLDVTSWIVSHL                                                                                                 | 1574.87358<br>1596.86601                                                       | 5.46<br>1.73                                             | 3.98<br>3.79                                  |
| 118473102 | 3103 | transketolase [Mycobacterium smegmatis str. MC2 155]                                    | 10.77 | 14.66 | FYSSPHNLIIFPGLAQVMGDGWETAR<br>FLVDVADVWSEVR<br>LGVPGVIR<br>LNIFPDGGVAR                                                             | 2793.35227<br>1447.78154<br>810.52239<br>1158.63127                            | $\Delta$ M [ppm]<br>2.43<br>1.62<br>3.37<br>3.99         | XCorr<br>4.68<br>3.11<br>1.63<br>2.02         |
| 118473351 | 4474 | acyl-CoA oxidase [Mycobacterium smegmatis str. MC2 155]                                 | 10.67 | 5.94  | Sequence<br>LASLMDIDPIYVWTHDSIGLGEDGPTHQPIEHLAALR<br>MNTGGVHGSALGADEVAATKK<br>AASGAVLSAVGPK<br>TIIGYPAPNK<br>AIPNLSVVRPGDPNETAYAWK | MH+ [Da]<br>4081.06306<br>2014.00339<br>1127.64324<br>1073.59917<br>2298.19974 | $\Delta$ M [ppm]<br>3.45<br>0.53<br>1.12<br>0.15<br>5.19 | XCorr<br>3.76<br>2.92<br>2.20<br>1.89<br>1.37 |
| 118471237 | 6263 | glutamate synthase [Mycobacterium smegmatis str. MC2 155]                               | 10.29 | 15.70 | Sequence<br>SYALQFAQNELVAK<br>TAAQTIIQTIIDTR<br>FTTMLGTLIR                                                                         | MH+ [Da]<br>1581.83513<br>1544.86650<br>1198.66692                             | $\Delta$ M [ppm]<br>5.02<br>1.42<br>1.32                 | XCorr<br>4.09<br>3.76<br>2.83                 |
| 118467533 | 3951 | hypothetical protein MSMEG_3951 [Mycobacterium smegmatis str. MC2 155]                  | 10.17 | 14.70 | Sequence<br>GASEVGTSTTTGDGGMTPEER<br>ALALGADAVAIGTAAIIALGDNHPR<br>HPLHLDIPVTIAGmSFGALSAGAK                                         | MH+ [Da]<br>2039.88371<br>2371.31211<br>2663.38749                             | $\Delta$ M [ppm]<br>0.68<br>1.16<br>7.93                 | XCorr<br>4.33<br>3.57<br>2.39                 |
| 118467777 | 4298 | 3-methyl-2-oxobutanoate hydroxymethyltransferase [Mycobacterium smegmatis str. MC2 155] | 10.02 | 13.59 | Sequence<br>AALIIVASDANPFGGMSK<br>LGVPPAHLVVAADPR<br>HFPPSPVGSALLCR                                                                | MH+ [Da]<br>1648.84368<br>1511.87326<br>1603.81059                             | $\Delta$ M [ppm]<br>4.40<br>2.58<br>3.48                 | XCorr<br>3.70<br>2.67<br>1.74                 |
|           |      |                                                                                         |       |       | Sequence<br>GAPHALVIGDLPFGSYEDGFSQALATATR<br>VADQIATLSR                                                                            | MH+ [Da]<br>2911.46225<br>1073.59709                                           | $\Delta$ M [ppm]<br>1.25<br>1.95                         | XCorr<br>7.22<br>2.81                         |

|           |      |                                                                                       |      |       |                         |          |            |                     |       |
|-----------|------|---------------------------------------------------------------------------------------|------|-------|-------------------------|----------|------------|---------------------|-------|
| 118470813 | 6267 | thiocyanate hydrolase subunit gamma<br>[Mycobacterium smegmatis str. MC2 155]         | 9.95 | 20.76 | AVGVDWLEPTGFGTSPSDFATFK | Sequence | MH+ [Da]   | $\Delta$ M<br>[ppm] | XCorr |
|           |      |                                                                                       |      |       | FTEFAEQIGPTPAAR         |          | 2342.13725 | 1.36                | 4.35  |
|           |      |                                                                                       |      |       | QLALTDALAASK            |          | 1634.82646 | 5.56                | 3.36  |
|           |      |                                                                                       |      |       |                         |          | 1201.68291 | 3.47                | 2.23  |
| 118469884 | 1424 | FMN-dependent dehydrogenase<br>[Mycobacterium smegmatis str. MC2 155]                 | 9.78 | 12.28 | TMVVTMPPEALTKPR         | Sequence | MH+ [Da]   | $\Delta$ M<br>[ppm] | XCorr |
|           |      |                                                                                       |      |       | ALPVIAEAVGDQVEVLLDGGIRR |          | 1605.82488 | 5.39                | 3.44  |
|           |      |                                                                                       |      |       | GGIDSALMGLGR            |          | 2390.34299 | 1.11                | 3.27  |
|           |      |                                                                                       |      |       |                         |          | 1146.59844 | 4.17                | 3.07  |
| 118472340 | 1091 | urease accessory protein UreE<br>[Mycobacterium smegmatis str. MC2 155]               | 9.54 | 30.92 | ILDTTVGWSTDQPIAAGR      | Sequence | MH+ [Da]   | $\Delta$ M<br>[ppm] | XCorr |
|           |      |                                                                                       |      |       | AGAPQTLTLR              |          | 1841.97820 | 1.37                | 3.44  |
|           |      |                                                                                       |      |       | LGFLAGHLHWK             |          | 1027.59209 | 2.50                | 2.19  |
|           |      |                                                                                       |      |       | IADLLASGR               |          | 1278.71610 | 4.27                | 2.00  |
|           |      |                                                                                       |      |       |                         |          | 915.52910  | 3.54                | 1.90  |
| 118469672 | 5252 | pantothenate kinase [Mycobacterium<br>smegmatis str. MC2 155]                         | 9.05 | 17.95 | VDLVTTDGLYPNAELAR       | Sequence | MH+ [Da]   | $\Delta$ M<br>[ppm] | XCorr |
|           |      |                                                                                       |      |       | LHLQVAAR                |          | 1994.02690 | 1.95                | 4.05  |
|           |      |                                                                                       |      |       | VLQALLAR                |          | 1020.63315 | 1.79                | 2.76  |
|           |      |                                                                                       |      |       | DIWHSINRPNIENILPTRPR    |          | 883.57652  | 4.66                | 2.24  |
|           |      |                                                                                       |      |       |                         |          | 2554.40395 | 1.46                | 1.99  |
| 118471384 | 0688 | aminotransferase AlaT [Mycobacterium<br>smegmatis str. MC2 155]                       | 8.63 | 9.43  | LNIGNPAPFGGEAPPDVMR     | Sequence | MH+ [Da]   | $\Delta$ M<br>[ppm] | XCorr |
|           |      |                                                                                       |      |       | LNIEIPGVSCVKPR          |          | 2058.05229 | 2.17                | 3.78  |
|           |      |                                                                                       |      |       | IVTLPWAR                |          | 1468.79802 | 2.65                | 2.92  |
|           |      |                                                                                       |      |       |                         |          | 955.57323  | 0.86                | 1.93  |
| 118467799 | 3084 | glyceraldehyde-3-phosphate<br>dehydrogenase [Mycobacterium smegmatis<br>str. MC2 155] | 8.43 | 12.35 | VPIPTGSVTDLTAELAK       | Sequence | MH+ [Da]   | $\Delta$ M<br>[ppm] | XCorr |
|           |      |                                                                                       |      |       | LADLVALVGK              |          | 1711.95195 | 2.47                | 3.41  |
|           |      |                                                                                       |      |       | AAALNIVPTSTGAAK         |          | 998.62505  | 0.53                | 2.81  |
|           |      |                                                                                       |      |       |                         |          | 1384.78398 | 3.21                | 2.21  |
| 118470673 | 4694 | HNH endonuclease [Mycobacterium<br>smegmatis str. MC2 155]                            | 7.00 | 18.75 | ADVWHDDPTSPVHSASR       | Sequence | MH+ [Da]   | $\Delta$ M<br>[ppm] | XCorr |
|           |      |                                                                                       |      |       |                         |          | 1902.93033 | -0.09               | 4.54  |

|           |      |                                                                               |      |       |                     |            |                  |       |
|-----------|------|-------------------------------------------------------------------------------|------|-------|---------------------|------------|------------------|-------|
| 118470943 | 3535 | agmatinase [Mycobacterium smegmatis str. MC2 155]                             | 6.90 | 8.93  | VLLLNATYEPILTALPIRR | 2053.21946 | 1.24             | 1.96  |
|           |      | Sequence                                                                      |      |       |                     | MH+ [Da]   | $\Delta$ M [ppm] | XCorr |
|           |      | LIESGAVPGSHFVQVGLR                                                            |      |       |                     | 1866.03130 | 4.29             | 4.69  |
|           |      | AVMDDAVGEALAK                                                                 |      |       |                     | 1289.64690 | 4.83             | 2.21  |
| 118468699 | 5790 | Ssec protein [Mycobacterium smegmatis str. MC2 155]                           | 6.74 | 28.89 |                     |            |                  |       |
|           |      | Sequence                                                                      |      |       |                     | MH+ [Da]   | $\Delta$ M [ppm] | XCorr |
|           |      | VWDGGQAVGGAFVFR                                                               |      |       |                     | 1418.74053 | 1.26             | 3.14  |
|           |      | FFAAPGTWTVR                                                                   |      |       |                     | 1252.64861 | 0.98             | 1.95  |
| 118472927 | 3773 | acetylornithine aminotransferase [Mycobacterium smegmatis str. MC2 155]       | 6.38 | 11.54 |                     |            |                  |       |
|           |      | Sequence                                                                      |      |       |                     | MH+ [Da]   | $\Delta$ M [ppm] | XCorr |
|           |      | DAGFLVNAAPEVVR                                                                |      |       |                     | 1528.81877 | 4.49             | 3.96  |
|           |      | GILLQGMILVPSAK                                                                |      |       |                     | 1395.85893 | 1.35             | 2.42  |
|           |      | HGALLVLDEVQTVGVR                                                              |      |       |                     | 1663.92130 | 5.18             | 1.58  |
| 118471704 | 3461 | catalase/peroxidase HPI [Mycobacterium smegmatis str. MC2 155]                | 6.23 | 4.81  |                     |            |                  |       |
|           |      | Sequence                                                                      |      |       |                     | MH+ [Da]   | $\Delta$ M [ppm] | XCorr |
|           |      | AVFLGVTAPQLTALVGLR                                                            |      |       |                     | 1947.10808 | 0.91             | 3.53  |
|           |      | VSLADLIVLAGSAAIK                                                              |      |       |                     | 1669.97502 | 0.88             | 2.70  |
| 118471043 | 6142 | nucleoside-diphosphate-sugar epimerase [Mycobacterium smegmatis str. MC2 155] | 6.02 | 13.65 |                     |            |                  |       |
|           |      | Sequence                                                                      |      |       |                     | MH+ [Da]   | $\Delta$ M [ppm] | XCorr |
|           |      | LLADGHVWGLDSSLGR                                                              |      |       |                     | 1780.92752 | 4.84             | 3.38  |
|           |      | NLYDLDCSHIAPAWVYGGPR                                                          |      |       |                     | 2175.03897 | 4.66             | 2.64  |
|           |      | TVEFFR                                                                        |      |       |                     | 798.41765  | 3.94             | 0.91  |
| 118472335 | 2447 | regulatory protein [Mycobacterium smegmatis str. MC2 155]                     | 6.01 | 8.74  |                     |            |                  |       |
|           |      | Sequence                                                                      |      |       |                     | MH+ [Da]   | $\Delta$ M [ppm] | XCorr |
|           |      | AAADMINESVLEDLSHQVLAISPR                                                      |      |       |                     | 2678.39408 | 4.53             | 3.61  |
|           |      | LIIPHTPAAPAR                                                                  |      |       |                     | 1256.74956 | 1.69             | 2.41  |
|           |      | IIDAVTHSVR                                                                    |      |       |                     | 1110.62885 | 2.00             | 1.25  |
| 118473788 | 2211 | DNA-binding protein [Mycobacterium smegmatis str. MC2 155]                    | 5.99 | 10.39 |                     |            |                  |       |
|           |      | Sequence                                                                      |      |       |                     | MH+ [Da]   | $\Delta$ M [ppm] | XCorr |
|           |      | IFDRLDDTPAEIVTELGETLR                                                         |      |       |                     | 2403.24076 | 0.18             | 3.40  |
|           |      | TGLAEFLR                                                                      |      |       |                     | 906.50780  | 3.76             | 2.59  |
| 118473160 | 1442 | 30S ribosomal protein S3 [Mycobacterium smegmatis str. MC2 155]               | 5.80 | 20.36 |                     |            |                  |       |
|           |      | Sequence                                                                      |      |       |                     | MH+ [Da]   | $\Delta$ M [ppm] | XCorr |
|           |      | QVQUNLILEVKNPESQAQLVAQGVAFQLSNR                                               |      |       |                     | 3303.77085 | 1.56             | 3.19  |
|           |      | AGIADVEIER                                                                    |      |       |                     | 1072.56706 | 3.43             | 2.61  |



|           |      |                                                                                                                                 |      |       |                              |            |                  |       |
|-----------|------|---------------------------------------------------------------------------------------------------------------------------------|------|-------|------------------------------|------------|------------------|-------|
| 118468954 | 2600 | regulatory protein [Mycobacterium smegmatis str. MC2 155]                                                                       | 5.73 | 10.57 | LGITTEWK                     | 947.52410  | 4.64             | 1.43  |
|           |      |                                                                                                                                 |      |       | LLATGLER                     | 872.51970  | -0.39            | 1.36  |
| 118470281 | 0314 | glucose-6-phosphate 1-dehydrogenase [Mycobacterium smegmatis str. MC2 155]                                                      | 5.43 | 5.25  | LIWQAGLLAPVEGPLR             | 1733.01164 | $\Delta$ M [ppm] | XCorr |
|           |      |                                                                                                                                 |      |       | LIQALQGAAR                   | 1040.62261 | 1.39             | 2.74  |
|           |      |                                                                                                                                 |      |       | VLEALEPLTAEQITQR             | 1697.91496 | $\Delta$ M [ppm] | XCorr |
|           |      |                                                                                                                                 |      |       | GDYYDQSGALR                  | 1244.55461 | 0.30             | 2.21  |
| 118468890 | 4956 | threonine synthase [Mycobacterium smegmatis str. MC2 155]                                                                       | 5.32 | 10.28 | FLAATDEILAAVHLVAR            | 2003.06211 | $\Delta$ M [ppm] | XCorr |
|           |      |                                                                                                                                 |      |       | TEGVFVEPASAASIAGLLK          | 1860.01286 | 0.78             | 2.49  |
| 118472834 | 1456 | hypothetical protein MSMEG_1456 [Mycobacterium smegmatis str. MC2 155]                                                          | 5.31 | 4.46  | EGVFAVARGVLPFR               | 1258.73467 | $\Delta$ M [ppm] | XCorr |
|           |      |                                                                                                                                 |      |       | LDLLDEVHSAVER                | 1495.77674 | 1.05             | 2.16  |
| 118473872 | 5438 | dimethyladenosine transferase [Mycobacterium smegmatis str. MC2 155]                                                            | 5.13 | 10.77 | QVARPSASAPSVSAEA             | 1527.77580 | $\Delta$ M [ppm] | XCorr |
|           |      |                                                                                                                                 |      |       | LAAEPGGKDYGVPSAK             | 1559.80606 | -0.27            | 2.53  |
| 118468571 | 1682 | flavin-containing monoxygenase FMO [Mycobacterium smegmatis str. MC2 155]                                                       | 4.91 | 6.18  | VVVAATGAFQKPVLPFR            | 1716.98674 | $\Delta$ M [ppm] | XCorr |
|           |      |                                                                                                                                 |      |       | VIADHIALQR                   | 1199.65317 | 0.00             | 1.70  |
| 190358683 | 4936 | RecName: Full=ATP synthase subunit beta; AltName: Full=ATP synthase F1 sector subunit beta; AltName: Full=F-ATPase subunit beta | 4.70 | 4.63  | ITGPVVDVEFPR                 | 1328.72759 | $\Delta$ M [ppm] | XCorr |
|           |      |                                                                                                                                 |      |       | VVDLLTPYVR                   | 1174.68437 | 1.10             | 2.33  |
| 118472797 | 2310 | monoxygenase [Mycobacterium smegmatis str. MC2 155]                                                                             | 4.70 | 8.02  | VAVIGTGASAIQIVPEIKDVAELHLYQR | 3089.73672 | $\Delta$ M [ppm] | XCorr |
|           |      |                                                                                                                                 |      |       | VVGQATAAVDK                  | 1134.61614 | 0.65             | 1.95  |

|           |      |                                                                                    |      |       |                       |          |            |                  |       |
|-----------|------|------------------------------------------------------------------------------------|------|-------|-----------------------|----------|------------|------------------|-------|
| 118467862 | 4367 | formamidase [Mycobacterium smegmatis str. MC2 155]                                 | 4.19 | 5.50  | YLDSHLSYQR            | Sequence | MH+ [Da]   | $\Delta$ M [ppm] | XCorr |
|           |      |                                                                                    |      |       | IIDPGMGAPHSSFFN       | Sequence | 1281.62336 | 0.87             | 2.17  |
| 118469867 | 5937 | 4-hydroxy-2-ketovaleate aldolase [Mycobacterium smegmatis str. MC2 155]            | 4.09 | 8.60  | FGAGAGNAPVEALIGVFDK   | Sequence | 1329.59050 | 0.92             | 2.02  |
|           |      |                                                                                    |      |       | YGVPAPHQLLHR          | Sequence | MH+ [Da]   | $\Delta$ M [ppm] | XCorr |
|           |      |                                                                                    |      |       |                       |          | 1832.95879 | 2.48             | 4.09  |
|           |      |                                                                                    |      |       |                       |          | 1290.70815 | 1.20             | 1.95  |
| 118472253 | 6720 | epoxide hydrolase [Mycobacterium smegmatis str. MC2 155]                           | 4.02 | 10.10 |                       | Sequence | MH+ [Da]   | $\Delta$ M [ppm] | XCorr |
|           |      |                                                                                    |      |       | AGAGEPVLHGWPGTWYAWR   | Sequence | 2394.21805 | 1.57             | 2.05  |
|           |      |                                                                                    |      |       | LLEFWMR               | Sequence | 1123.59795 | 0.92             | 1.97  |
| 116266976 | 1395 | putative elongation factor G [Mycobacterium smegmatis str. MC2 155]                | 3.53 | 4.28  |                       | Sequence | MH+ [Da]   | $\Delta$ M [ppm] | XCorr |
|           |      |                                                                                    |      |       | AQVPLSEMGVVGDLR       | Sequence | 1781.89238 | 1.80             | 3.53  |
|           |      |                                                                                    |      |       | LFQMHANKENPVER        | Sequence | 1712.85573 | 1.14             | 1.33  |
| 118472859 | 3847 | tyramine oxidase [Mycobacterium smegmatis str. MC2 155]                            | 3.14 | 4.75  |                       | Sequence | MH+ [Da]   | $\Delta$ M [ppm] | XCorr |
|           |      |                                                                                    |      |       | LVPTGAIPPMLDPESVQLQR  | Sequence | 2130.16460 | 0.82             | 3.14  |
|           |      |                                                                                    |      |       | SHPDVIAALAR           | Sequence | 1149.64177 | 3.68             | 1.23  |
| 118471203 | 1119 | glutamine amidotransferase, class I [Mycobacterium smegmatis str. MC2 155]         | 2.91 | 15.55 |                       | Sequence | MH+ [Da]   | $\Delta$ M [ppm] | XCorr |
|           |      |                                                                                    |      |       | ISTVWGGPVRTTYHHQIGIGR | Sequence | 2175.17143 | 2.04             | 2.91  |
|           |      |                                                                                    |      |       | AGGEPILLPTALGHAR      | Sequence | 1572.89261 | 4.37             | 1.78  |
| 118467676 | 0695 | isoniazid inducible protein IniA [Mycobacterium smegmatis str. MC2 155]            | 2.80 | 4.32  |                       | Sequence | MH+ [Da]   | $\Delta$ M [ppm] | XCorr |
|           |      |                                                                                    |      |       | SQLLNSLNIIPVAR        | Sequence | 1537.90752 | 0.91             | 2.80  |
|           |      |                                                                                    |      |       | QIVDANIAHLQR          | Sequence | 1377.76055 | 0.55             | 1.55  |
| 118470190 | 2260 | transcriptional regulator [Mycobacterium smegmatis str. MC2 155]                   | 2.47 | 6.52  |                       | Sequence | MH+ [Da]   | $\Delta$ M [ppm] | XCorr |
|           |      |                                                                                    |      |       | IEEEMANAHLTR          | Sequence | 1413.67920 | 0.03             | 2.47  |
|           |      |                                                                                    |      |       | WGETPSETLRR           | Sequence | 1331.67221 | 1.44             | 1.62  |
| 118472108 | 2594 | asparagine synthase (glutamine-hydrolyzing) [Mycobacterium smegmatis str. MC2 155] | 2.30 | 4.99  |                       | Sequence | MH+ [Da]   | $\Delta$ M [ppm] | XCorr |
|           |      |                                                                                    |      |       | VPFLDHELVELAATCPPELK  | Sequence | 2278.18320 | 1.89             | 2.30  |
|           |      |                                                                                    |      |       | GLRPEAVER             | Sequence | 1173.64002 | 2.10             | 1.90  |
